# Supplementary material for: Evaluation of psychological stress in scientific researchers during the 2019–2020 COVID-19 outbreak in China
Source: PeerJ. 2020 Jul 6;8:e9497. doi: 10.7717/peerj.9497 (PMC7346863; doi:10.7717/peerj.9497)
Supplement: Supplemental Information 2 [file peerj-08-9497-s002.xlsx]

## Sheet: Sheet1
numbers	submission time	time	gender	age	Category of school or institution	title of technical post	educational background	Master: are you well prepared for graduation?	master:do you have any plans for further study?	districts	participate in academic research recentely	field of study	life science:programme type	non-life science:programme type	want to cry	feel lonely	feel depressed	feel worried.	I think I might go crazy.	Fidgeting and not knowing what to do.	I feel frightened.	I feel nervous and uneasy in the heart.	easy to feel stressful	feel confused	easy to feel anger	feel confused by the pain of the neck or the head	easy to be tired	Can't fall asleep in 30 minutes.	Get up at night	go to the bathroom at the midnight.	It's hard to stay awake when waking up.	feel hopeless	feel harder to concentrate	I don't think I can succeed even if I try hard.	have no interests in the things I used intersted in	eat less	be lazy	I've been smoking or drinking a lot lately.	project schedule	the main reasons for the projects-delaying	Obstructed research projects you participated in during the COVID-19 outbreak made you feel.	The NCP delays the completion date of scientific research project.	The blocked research projects caused by the COVID-19 has infulenced the graduation/project conclusion/funds applications	Original research programmes need to be changed or cut	Epidemic resistance reduces the value of research	The COVID-19 has caused the failures of the original experimental results	The COVID-19 asked more energy input	The COVID-19 has already, or is about to, caused a great loss for projects	The COVID-19 has influenced the original academic exchange activities
1	2020/3/3 13:49:42	183s	female	18-24	985、211 universities	none	undergraduates	(pass)	(pass)	non-Hubei provinces	yes	Life-science	clinical medicine	(pass)	disagree	strongly disagree	disagree	disagree	strongly disagree	disagree	strongly disagree	strongly disagree	strongly disagree	neutral	disagree	strongly disagree	neutral	agree	disagree	neutral	neutral	strongly disagree	disagree	strongly disagree	disagree	strongly disagree	agree	strongly disagree	Basically at a standstill	laboratory facilities are closed or equipments are unavailable┋some researchers(including students) cannot attend┋difficult to obtain (experimental materials/samples) on time	few influences to my emotion	yes	no	yes	yes	yes	yes	no	no
2	2020/3/3 18:10:09	567s	male	25-39	university affiliated hospital	lecturer(assistant researcher, attending physician)	clinical medical staff(including postdoctoral)	(pass)	(pass)	non-Hubei provinces	yes	Life-science	clinical medicine	(pass)	disagree	neutral	disagree	neutral	strongly disagree	agree	disagree	disagree	disagree	neutral	neutral	neutral	neutral	disagree	disagree	strongly agree	neutral	strongly disagree	neutral	strongly disagree	disagree	disagree	strongly agree	strongly disagree	still under way but at a slower pace than before	laboratory facilities are closed or equipments are unavailable┋some researchers(including students) cannot attend┋difficult to obtain (experimental materials/samples) on time	feeling stress and worry	yes	no	no	no	no	yes	yes	yes
3	2020/3/3 18:56:46	18408s	female	25-39	985、211 universities	lecturer(assistant researcher, attending physician)	clinical medical staff(including postdoctoral)	(pass)	(pass)	non-Hubei provinces	yes	Life-science	clinical medicine	(pass)	agree	neutral	neutral	neutral	neutral	neutral	neutral	neutral	neutral	neutral	neutral	neutral	agree	agree	agree	disagree	disagree	disagree	disagree	neutral	neutral	neutral	disagree	strongly disagree	still under way but at a slower pace than before	laboratory facilities are closed or equipments are unavailable┋some researchers(including students) cannot attend┋academic communications between co-workers have been blocked┋difficult to obtain (experimental materials/samples) on time	feeling stress and worry	yes	yes	yes	yes	yes	yes	yes	yes
4	2020/3/3 19:19:55	175s	male	25-39	985、211 universities	associate professor(associate researcher, associate chief physician)	basic research staff(including postdoctoral)	(pass)	(pass)	non-Hubei provinces	yes	the humanities and social sciences	(pass)	applied research	disagree	neutral	neutral	agree	disagree	neutral	neutral	neutral	neutral	disagree	neutral	neutral	agree	neutral	neutral	agree	disagree	disagree	disagree	disagree	disagree	neutral	agree	agree	still under way but at a slower pace than before	some researchers(including students) cannot attend┋academic communications between co-workers have been blocked	feeling stress and worry	no	no	no	yes	no	yes	no	yes
5	2020/3/3 19:20:00	156s	female	25-39	985、211 universities	lecturer(assistant researcher, attending physician)	clinical medical staff(including postdoctoral)	(pass)	(pass)	non-Hubei provinces	yes	Life-science	basic medicine	(pass)	neutral	strongly disagree	neutral	neutral	disagree	neutral	disagree	disagree	neutral	disagree	neutral	disagree	neutral	disagree	neutral	strongly disagree	disagree	disagree	neutral	disagree	neutral	disagree	disagree	strongly disagree	Basically at a standstill	laboratory facilities are closed or equipments are unavailable┋some researchers(including students) cannot attend┋difficult to obtain (experimental materials/samples) on time	feeling stress and worry	yes	yes	no	no	yes	yes	yes	no
6	2020/3/3 19:20:07	182s	male	25-39	985、211 universities	associate professor(associate researcher, associate chief physician)	clinical medical staff(including postdoctoral)	(pass)	(pass)	non-Hubei provinces	yes	Life-science	basic medicine	(pass)	strongly disagree	strongly disagree	strongly disagree	strongly disagree	strongly disagree	strongly disagree	strongly disagree	strongly disagree	strongly disagree	disagree	strongly disagree	strongly disagree	strongly disagree	neutral	strongly disagree	strongly disagree	strongly disagree	strongly disagree	strongly disagree	strongly disagree	strongly disagree	strongly disagree	strongly disagree	strongly disagree	Basically at a standstill	laboratory facilities are closed or equipments are unavailable┋some researchers(including students) cannot attend	feeling stress and worry	yes	yes	no	yes	yes	yes	yes	yes
7	2020/3/3 19:20:20	189s	female	25-39	985、211 universities	lecturer(assistant researcher, attending physician)	clinical medical staff(including postdoctoral)	(pass)	(pass)	non-Wuhan districts in Hubei provinces	yes	Life-science	clinical medicine	(pass)	disagree	strongly disagree	strongly disagree	strongly disagree	strongly disagree	strongly disagree	strongly disagree	strongly disagree	strongly disagree	strongly disagree	strongly disagree	strongly disagree	strongly disagree	strongly disagree	disagree	disagree	disagree	strongly disagree	strongly disagree	strongly disagree	strongly disagree	strongly disagree	strongly disagree	strongly disagree	Basically at a standstill	others	feeling stress and worry	yes	yes	yes	yes	yes	yes	yes	yes
8	2020/3/3 19:20:52	193s	female	40-59	985、211 universities	associate professor(associate researcher, associate chief physician)	basic research staff(including postdoctoral)	(pass)	(pass)	non-Hubei provinces	yes	Life-science	basic medicine	(pass)	strongly disagree	strongly disagree	strongly disagree	strongly disagree	strongly disagree	strongly disagree	strongly disagree	strongly disagree	strongly disagree	strongly disagree	strongly disagree	strongly disagree	strongly disagree	strongly disagree	strongly disagree	strongly disagree	strongly disagree	strongly disagree	strongly disagree	strongly disagree	disagree	disagree	neutral	strongly disagree	Basically at a standstill	laboratory facilities are closed or equipments are unavailable	feeling stress and worry	yes	yes	yes	no	no	yes	yes	yes
9	2020/3/3 19:24:15	276s	female	25-39	university affiliated hospital	lecturer(assistant researcher, attending physician)	clinical medical staff(including postdoctoral)	(pass)	(pass)	non-Hubei provinces	yes	Life-science	clinical medicine	(pass)	strongly disagree	disagree	disagree	strongly disagree	strongly disagree	strongly disagree	strongly disagree	strongly disagree	strongly disagree	strongly disagree	strongly disagree	strongly disagree	strongly disagree	strongly disagree	strongly disagree	disagree	strongly disagree	strongly disagree	strongly disagree	strongly disagree	strongly disagree	strongly disagree	disagree	strongly disagree	still under way but at a slower pace than before	laboratory facilities are closed or equipments are unavailable	few influences to my emotion	yes	no	no	no	no	yes	yes	no
10	2020/3/3 19:24:26	81s	female	18-24	985、211 universities	none	undergraduates	(pass)	(pass)	non-Hubei provinces	yes	Life-science	public health	(pass)	strongly disagree	strongly disagree	strongly disagree	strongly disagree	strongly disagree	strongly disagree	strongly disagree	strongly disagree	strongly disagree	strongly disagree	strongly disagree	strongly disagree	strongly disagree	strongly disagree	strongly disagree	strongly disagree	strongly disagree	strongly disagree	strongly disagree	strongly disagree	strongly disagree	strongly disagree	strongly disagree	strongly disagree	completely unaffected	(pass)	(pass)	no	no	no	no	no	no	no	yes
11	2020/3/3 19:24:46	318s	male	25-39	985、211 universities	associate professor(associate researcher, associate chief physician)	basic research staff(including postdoctoral)	(pass)	(pass)	non-Hubei provinces	yes	Life-science	basic medicine	(pass)	strongly disagree	strongly disagree	agree	disagree	strongly disagree	disagree	strongly disagree	strongly disagree	disagree	disagree	agree	neutral	neutral	disagree	neutral	neutral	strongly disagree	strongly disagree	disagree	strongly agree	disagree	strongly disagree	disagree	strongly disagree	still under way but at a slower pace than before	laboratory facilities are closed or equipments are unavailable	few influences to my emotion	no	no	yes	no	yes	no	no	yes
12	2020/3/3 19:26:50	223s	male	25-39	985、211 universities	lecturer(assistant researcher, attending physician)	clinical medical staff(including postdoctoral)	(pass)	(pass)	non-Hubei provinces	no	Life-science	clinical medicine	(pass)	agree	strongly disagree	strongly agree	disagree	strongly disagree	strongly disagree	strongly disagree	strongly disagree	strongly disagree	strongly disagree	agree	neutral	neutral	strongly disagree	strongly disagree	disagree	disagree	agree	strongly disagree	agree	neutral	strongly disagree	strongly disagree	strongly disagree	completely unaffected	(pass)	(pass)	no	no	no	no	no	no	no	no
13	2020/3/3 19:26:51	243s	female	40-59	985、211 universities	associate professor(associate researcher, associate chief physician)	basic research staff(including postdoctoral)	(pass)	(pass)	non-Hubei provinces	yes	Life-science	public health	(pass)	strongly disagree	strongly disagree	disagree	neutral	disagree	disagree	disagree	disagree	disagree	neutral	neutral	disagree	disagree	disagree	disagree	agree	neutral	disagree	agree	agree	neutral	neutral	neutral	strongly disagree	still under way but at a slower pace than before	some researchers(including students) cannot attend	feeling stress and worry	yes	yes	no	no	no	yes	no	no
14	2020/3/3 19:27:28	226s	female	25-39	985、211 universities	none	master candidate(non-graduate year)	inadequate preparation	yes	non-Hubei provinces	yes	Life-science	basic medicine	(pass)	disagree	neutral	neutral	agree	disagree	neutral	disagree	disagree	neutral	neutral	neutral	neutral	disagree	disagree	neutral	disagree	agree	disagree	disagree	strongly disagree	neutral	neutral	agree	strongly disagree	Basically at a standstill	laboratory facilities are closed or equipments are unavailable	feeling stress and worry	yes	yes	yes	yes	no	yes	yes	yes
15	2020/3/3 19:28:31	238s	female	18-24	university affiliated hospital	none	master candidate(non-graduate year)	inadequate preparation	no	non-Hubei provinces	no	Life-science	others	(pass)	strongly disagree	strongly disagree	strongly disagree	strongly disagree	strongly disagree	strongly disagree	strongly disagree	strongly disagree	strongly disagree	strongly disagree	strongly disagree	strongly disagree	strongly disagree	disagree	disagree	strongly disagree	strongly disagree	strongly disagree	strongly disagree	strongly disagree	strongly disagree	strongly disagree	strongly disagree	strongly disagree	Basically at a standstill	laboratory facilities are closed or equipments are unavailable┋some researchers(including students) cannot attend	feeling stress and worry	no	no	no	no	no	yes	yes	yes
16	2020/3/3 19:29:26	368s	female	40-59	university affiliated hospital	lecturer(assistant researcher, attending physician)	clinical medical staff(including postdoctoral)	(pass)	(pass)	non-Hubei provinces	no	Life-science	clinical medicine	(pass)	strongly disagree	strongly disagree	strongly disagree	disagree	strongly disagree	strongly disagree	strongly disagree	disagree	strongly disagree	disagree	strongly disagree	disagree	disagree	strongly disagree	disagree	strongly disagree	strongly disagree	strongly disagree	disagree	strongly disagree	strongly disagree	disagree	disagree	strongly disagree	still under way but at a slower pace than before	academic communications between co-workers have been blocked	feeling stress and worry	yes	no	no	no	no	no	no	yes
17	2020/3/3 19:32:05	215s	female	40-59	university affiliated hospital	lecturer(assistant researcher, attending physician)	clinical medical staff(including postdoctoral)	(pass)	(pass)	non-Hubei provinces	yes	Life-science	clinical medicine	(pass)	strongly disagree	strongly disagree	strongly disagree	disagree	strongly disagree	disagree	strongly disagree	disagree	disagree	strongly disagree	disagree	strongly disagree	strongly disagree	strongly disagree	strongly disagree	strongly disagree	strongly disagree	disagree	strongly disagree	disagree	strongly disagree	strongly disagree	disagree	strongly disagree	Basically at a standstill	others	feeling stress and worry	yes	yes	no	yes	no	yes	no	no
18	2020/3/3 19:33:32	283s	male	40-59	985、211 universities	associate professor(associate researcher, associate chief physician)	basic research staff(including postdoctoral)	(pass)	(pass)	non-Hubei provinces	yes	Life-science	public health	(pass)	strongly disagree	strongly disagree	strongly disagree	strongly disagree	strongly disagree	disagree	strongly disagree	disagree	disagree	strongly disagree	strongly disagree	strongly disagree	strongly disagree	strongly disagree	strongly disagree	strongly disagree	strongly disagree	strongly disagree	strongly disagree	strongly disagree	strongly disagree	strongly disagree	disagree	strongly disagree	Basically at a standstill	laboratory facilities are closed or equipments are unavailable┋some researchers(including students) cannot attend┋difficult to obtain (experimental materials/samples) on time	feeling stress and worry	yes	yes	yes	yes	yes	yes	no	yes
19	2020/3/3 19:34:56	184s	female	40-59	university affiliated hospital	associate professor(associate researcher, associate chief physician)	clinical medical staff(including postdoctoral)	(pass)	(pass)	non-Hubei provinces	yes	Life-science	clinical medicine	(pass)	strongly disagree	strongly disagree	strongly disagree	strongly disagree	strongly disagree	strongly disagree	strongly disagree	strongly disagree	strongly disagree	disagree	strongly disagree	disagree	disagree	disagree	disagree	disagree	disagree	strongly disagree	strongly disagree	disagree	strongly disagree	strongly disagree	neutral	strongly disagree	Basically at a standstill	laboratory facilities are closed or equipments are unavailable┋some researchers(including students) cannot attend┋difficult to obtain (experimental materials/samples) on time	feeling stress and worry	yes	yes	no	yes	yes	yes	yes	yes
20	2020/3/3 19:39:45	210s	female	25-39	university affiliated hospital	none	master candidate(non-graduate year)	inadequate preparation	yes	non-Hubei provinces	no	Life-science	clinical medicine	(pass)	agree	disagree	disagree	neutral	agree	disagree	disagree	strongly disagree	disagree	strongly disagree	agree	strongly disagree	strongly disagree	strongly agree	strongly disagree	strongly disagree	neutral	disagree	strongly disagree	strongly disagree	strongly disagree	strongly disagree	strongly disagree	strongly disagree	Basically at a standstill	some researchers(including students) cannot attend	feeling stress and worry	yes	yes	no	no	no	yes	no	yes
21	2020/3/3 19:41:34	111s	female	18-24	985、211 universities	none	undergraduates	(pass)	(pass)	non-Hubei provinces	yes	Life-science	public health	(pass)	disagree	disagree	disagree	disagree	strongly disagree	disagree	neutral	strongly disagree	disagree	disagree	disagree	disagree	disagree	neutral	strongly disagree	strongly disagree	disagree	strongly disagree	disagree	strongly disagree	disagree	strongly disagree	disagree	strongly disagree	Basically at a standstill	some researchers(including students) cannot attend┋academic communications between co-workers have been blocked	feeling stress and worry	no	no	no	no	no	no	no	no
22	2020/3/3 19:42:23	151s	female	18-24	985、211 universities	none	undergraduates	(pass)	(pass)	non-Hubei provinces	yes	Life-science	public health	(pass)	strongly disagree	strongly disagree	strongly disagree	strongly disagree	strongly disagree	strongly disagree	strongly disagree	strongly disagree	strongly disagree	strongly disagree	strongly disagree	strongly disagree	strongly disagree	neutral	strongly disagree	strongly disagree	strongly disagree	strongly disagree	strongly disagree	strongly disagree	strongly disagree	strongly disagree	neutral	strongly disagree	still under way but at a slower pace than before	academic communications between co-workers have been blocked	feeling stress and worry	no	no	no	no	no	yes	no	no
23	2020/3/3 19:42:36	90s	female	18-24	985、211 universities	none	undergraduates	(pass)	(pass)	non-Hubei provinces	yes	Life-science	public health	(pass)	strongly disagree	strongly disagree	strongly disagree	strongly disagree	strongly disagree	strongly disagree	strongly disagree	strongly disagree	strongly disagree	strongly disagree	strongly disagree	strongly disagree	strongly disagree	strongly disagree	strongly disagree	strongly disagree	strongly disagree	strongly disagree	strongly disagree	strongly disagree	strongly disagree	agree	agree	strongly disagree	completely unaffected	(pass)	(pass)	no	no	no	no	no	no	no	no
24	2020/3/3 19:42:48	517s	male	18-24	985、211 universities	none	undergraduates	(pass)	(pass)	non-Hubei provinces	yes	Life-science	public health	(pass)	agree	neutral	agree	agree	neutral	disagree	disagree	disagree	disagree	neutral	agree	agree	agree	agree	neutral	strongly disagree	agree	strongly disagree	strongly disagree	strongly disagree	agree	agree	agree	strongly disagree	still under way but at a slower pace than before	academic communications between co-workers have been blocked	feeling about to collapse	yes	yes	no	no	no	yes	no	no
25	2020/3/3 19:42:58	169s	female	18-24	985、211 universities	none	undergraduates	(pass)	(pass)	non-Hubei provinces	yes	Life-science	public health	(pass)	strongly disagree	strongly disagree	disagree	disagree	strongly disagree	disagree	strongly disagree	strongly disagree	strongly disagree	disagree	disagree	disagree	disagree	disagree	neutral	disagree	agree	strongly disagree	disagree	strongly disagree	strongly disagree	strongly disagree	neutral	strongly disagree	still under way but at a slower pace than before	academic communications between co-workers have been blocked	few influences to my emotion	no	no	no	no	no	yes	no	yes
26	2020/3/3 19:43:05	124s	female	18-24	985、211 universities	none	undergraduates	(pass)	(pass)	non-Hubei provinces	yes	Life-science	public health	(pass)	neutral	disagree	neutral	neutral	strongly disagree	strongly disagree	strongly disagree	strongly disagree	neutral	neutral	neutral	disagree	neutral	disagree	neutral	neutral	neutral	disagree	strongly disagree	neutral	strongly disagree	neutral	agree	strongly disagree	completely unaffected	(pass)	(pass)	no	no	no	no	no	no	no	no
27	2020/3/3 19:43:09	368s	female	40-59	general college	professor( researcher, chief physician)	basic research staff(including postdoctoral)	(pass)	(pass)	non-Hubei provinces	yes	the humanities and social sciences	(pass)	fundamental research/theoretical research	strongly disagree	strongly disagree	strongly disagree	disagree	strongly disagree	strongly disagree	disagree	strongly disagree	disagree	strongly disagree	disagree	strongly disagree	disagree	neutral	disagree	disagree	disagree	strongly disagree	neutral	strongly disagree	strongly disagree	strongly disagree	strongly agree	strongly disagree	completely unaffected	(pass)	(pass)	no	no	no	no	no	yes	no	yes
28	2020/3/3 19:43:29	161s	female	18-24	985、211 universities	none	undergraduates	(pass)	(pass)	non-Hubei provinces	yes	non-life science（engineering, natural science, etc.）	(pass)	applied research	disagree	strongly disagree	neutral	agree	strongly disagree	disagree	disagree	strongly disagree	neutral	neutral	disagree	disagree	disagree	strongly disagree	disagree	strongly disagree	disagree	strongly disagree	disagree	disagree	disagree	strongly disagree	disagree	strongly disagree	still under way but at a slower pace than before	some researchers(including students) cannot attend┋academic communications between co-workers have been blocked┋difficult to obtain (experimental materials/samples) on time	feeling stress and worry	yes	yes	yes	yes	no	yes	no	yes
29	2020/3/3 19:43:34	116s	female	18-24	university affiliated hospital	none	undergraduates	(pass)	(pass)	non-Hubei provinces	yes	Life-science	clinical medicine	(pass)	disagree	neutral	disagree	disagree	disagree	disagree	disagree	disagree	neutral	disagree	disagree	neutral	strongly disagree	strongly disagree	neutral	disagree	disagree	disagree	disagree	disagree	disagree	strongly disagree	neutral	strongly disagree	completely unaffected	(pass)	(pass)	no	no	no	no	no	no	no	no
30	2020/3/3 19:49:49	102s	female	18-24	985、211 universities	none	undergraduates	(pass)	(pass)	non-Hubei provinces	no	others	(pass)	others	strongly disagree	strongly disagree	neutral	disagree	strongly disagree	agree	disagree	disagree	neutral	strongly disagree	disagree	agree	agree	neutral	disagree	strongly disagree	strongly disagree	strongly disagree	disagree	disagree	disagree	neutral	agree	strongly disagree	completely unaffected	(pass)	(pass)	no	yes	no	no	no	no	no	yes
31	2020/3/3 19:51:18	629s	female	18-24	985、211 universities	none	undergraduates	(pass)	(pass)	non-Hubei provinces	no	non-life science（engineering, natural science, etc.）	(pass)	applied research	strongly disagree	strongly disagree	strongly disagree	strongly disagree	strongly disagree	strongly disagree	strongly disagree	strongly disagree	strongly disagree	strongly disagree	strongly disagree	strongly disagree	strongly disagree	disagree	disagree	strongly disagree	strongly disagree	strongly disagree	strongly disagree	strongly disagree	strongly disagree	strongly disagree	neutral	strongly disagree	Basically at a standstill	others〖主要为疫情本身的影响〗	few influences to my emotion	yes	no	no	no	no	no	no	yes
32	2020/3/3 19:51:28	247s	male	25-39	general college	professor( researcher, chief physician)	basic research staff(including postdoctoral)	(pass)	(pass)	non-Hubei provinces	yes	Life-science	public health	(pass)	strongly disagree	neutral	neutral	neutral	strongly disagree	disagree	disagree	disagree	disagree	neutral	disagree	disagree	neutral	neutral	neutral	disagree	disagree	disagree	neutral	strongly disagree	disagree	strongly disagree	strongly disagree	strongly disagree	still under way but at a slower pace than before	some researchers(including students) cannot attend	feeling stress and worry	yes	yes	yes	yes	yes	yes	yes	yes
33	2020/3/3 19:52:48	153s	male	18-24	985、211 universities	none	undergraduates	(pass)	(pass)	non-Hubei provinces	no	Life-science	clinical medicine	(pass)	strongly disagree	strongly disagree	disagree	disagree	strongly disagree	strongly disagree	strongly disagree	strongly disagree	disagree	disagree	strongly disagree	strongly disagree	disagree	strongly disagree	strongly disagree	strongly disagree	strongly disagree	strongly disagree	disagree	strongly disagree	strongly disagree	strongly disagree	strongly disagree	strongly disagree	Basically at a standstill	laboratory facilities are closed or equipments are unavailable┋some researchers(including students) cannot attend┋difficult to obtain (experimental materials/samples) on time	feeling stress and worry	no	no	no	no	yes	yes	no	yes
34	2020/3/3 19:53:48	80s	female	18-24	985、211 universities	none	undergraduates	(pass)	(pass)	non-Hubei provinces	no	Life-science	basic medicine	(pass)	strongly disagree	strongly disagree	strongly disagree	strongly disagree	strongly disagree	strongly disagree	strongly disagree	strongly disagree	strongly disagree	strongly disagree	strongly disagree	strongly disagree	strongly disagree	strongly disagree	strongly disagree	strongly disagree	strongly disagree	strongly disagree	strongly disagree	strongly disagree	strongly disagree	strongly disagree	strongly disagree	strongly disagree	Basically at a standstill	laboratory facilities are closed or equipments are unavailable	few influences to my emotion	yes	no	no	no	no	no	no	no
35	2020/3/3 19:54:13	118s	male	18-24	985、211 universities	none	undergraduates	(pass)	(pass)	non-Hubei provinces	no	Life-science	clinical medicine	(pass)	neutral	neutral	neutral	neutral	neutral	neutral	neutral	neutral	neutral	neutral	neutral	neutral	neutral	neutral	neutral	neutral	neutral	neutral	neutral	neutral	neutral	agree	neutral	disagree	completely unaffected	(pass)	(pass)	yes	yes	yes	no	yes	yes	no	yes
36	2020/3/3 19:54:26	85s	male	18-24	985、211 universities	none	undergraduates	(pass)	(pass)	non-Hubei provinces	yes	Life-science	clinical medicine	(pass)	neutral	neutral	neutral	neutral	neutral	neutral	neutral	neutral	neutral	neutral	neutral	neutral	neutral	neutral	neutral	neutral	neutral	neutral	neutral	neutral	neutral	neutral	neutral	neutral	Basically at a standstill	laboratory facilities are closed or equipments are unavailable┋some researchers(including students) cannot attend┋academic communications between co-workers have been blocked┋difficult to obtain (experimental materials/samples) on time	feeling relaxed and happy	yes	no	yes	no	no	yes	no	yes
37	2020/3/3 19:54:42	181s	female	18-24	985、211 universities	none	undergraduates	(pass)	(pass)	non-Hubei provinces	yes	Life-science	basic medicine	(pass)	strongly disagree	disagree	disagree	neutral	strongly disagree	strongly disagree	strongly disagree	strongly disagree	disagree	strongly disagree	strongly disagree	disagree	disagree	disagree	strongly disagree	strongly disagree	disagree	strongly disagree	strongly disagree	strongly disagree	strongly disagree	strongly disagree	strongly disagree	strongly disagree	completely unaffected	(pass)	(pass)	no	no	yes	no	no	no	no	no
38	2020/3/3 19:54:46	158s	male	18-24	985、211 universities	none	undergraduates	(pass)	(pass)	non-Hubei provinces	yes	Life-science	basic medicine	(pass)	disagree	disagree	disagree	agree	disagree	disagree	disagree	disagree	disagree	disagree	disagree	agree	disagree	disagree	disagree	disagree	disagree	disagree	disagree	disagree	disagree	disagree	disagree	disagree	completely unaffected	(pass)	(pass)	no	no	no	no	no	no	no	no
39	2020/3/3 19:55:08	166s	female	18-24	985、211 universities	none	undergraduates	(pass)	(pass)	non-Hubei provinces	yes	Life-science	basic medicine	(pass)	strongly disagree	strongly disagree	disagree	agree	strongly disagree	strongly disagree	strongly disagree	neutral	neutral	disagree	agree	neutral	disagree	strongly disagree	neutral	disagree	strongly disagree	strongly disagree	agree	neutral	disagree	strongly agree	strongly agree	strongly agree	still under way but at a slower pace than before	laboratory facilities are closed or equipments are unavailable	feeling stress and worry	yes	no	no	no	no	no	no	yes
40	2020/3/3 19:55:11	210s	male	18-24	985、211 universities	none	undergraduates	(pass)	(pass)	non-Hubei provinces	yes	Life-science	basic medicine	(pass)	neutral	neutral	neutral	disagree	neutral	agree	disagree	neutral	neutral	neutral	agree	disagree	agree	strongly disagree	strongly disagree	disagree	neutral	strongly disagree	disagree	disagree	disagree	strongly disagree	disagree	strongly disagree	completely unaffected	(pass)	(pass)	no	no	no	no	no	no	no	yes
41	2020/3/3 19:55:35	131s	female	18-24	985、211 universities	none	undergraduates	(pass)	(pass)	non-Hubei provinces	yes	Life-science	basic medicine	(pass)	disagree	neutral	disagree	disagree	strongly disagree	strongly disagree	disagree	agree	neutral	strongly disagree	strongly disagree	disagree	disagree	neutral	strongly disagree	strongly disagree	strongly disagree	strongly disagree	strongly disagree	strongly disagree	strongly disagree	disagree	strongly disagree	strongly disagree	still under way but at a slower pace than before	laboratory facilities are closed or equipments are unavailable┋some researchers(including students) cannot attend┋difficult to obtain (experimental materials/samples) on time	feeling stress and worry	yes	yes	no	no	no	no	no	yes
42	2020/3/3 19:55:39	234s	female	25-39	985、211 universities	lecturer(assistant researcher, attending physician)	basic research staff(including postdoctoral)	(pass)	(pass)	non-Hubei provinces	yes	Life-science	basic medicine	(pass)	strongly disagree	strongly disagree	strongly disagree	disagree	strongly disagree	strongly disagree	strongly disagree	strongly disagree	strongly disagree	strongly disagree	strongly disagree	strongly disagree	strongly disagree	strongly disagree	strongly disagree	strongly disagree	strongly disagree	strongly disagree	strongly disagree	strongly disagree	strongly disagree	strongly disagree	strongly disagree	strongly disagree	still under way but at a slower pace than before	laboratory facilities are closed or equipments are unavailable┋some researchers(including students) cannot attend┋difficult to obtain (experimental materials/samples) on time	feeling stress and worry	yes	yes	no	no	yes	yes	yes	yes
43	2020/3/3 19:55:58	153s	female	18-24	985、211 universities	none	master candidate(non-graduate year)	not yet	yes	non-Hubei provinces	yes	Life-science	clinical medicine	(pass)	neutral	neutral	neutral	agree	agree	agree	agree	agree	neutral	neutral	neutral	strongly agree	agree	agree	agree	agree	agree	neutral	agree	agree	neutral	disagree	agree	agree	still under way but at a slower pace than before	academic communications between co-workers have been blocked	feeling stress and worry	yes	yes	yes	yes	yes	yes	yes	yes
44	2020/3/3 19:56:43	202s	male	18-24	985、211 universities	none	undergraduates	(pass)	(pass)	non-Hubei provinces	no	others〖暂未从事研究〗	(pass)	others〖暂未从事研究〗	strongly disagree	strongly disagree	strongly disagree	strongly disagree	strongly disagree	strongly disagree	strongly disagree	strongly disagree	strongly disagree	strongly disagree	strongly disagree	strongly disagree	strongly disagree	strongly disagree	strongly disagree	strongly disagree	strongly disagree	strongly disagree	strongly disagree	strongly disagree	strongly disagree	strongly disagree	neutral	strongly disagree	completely unaffected	(pass)	(pass)	yes	yes	yes	yes	yes	yes	yes	yes
45	2020/3/3 19:57:19	195s	male	40-59	985、211 universities	professor( researcher, chief physician)	basic research staff(including postdoctoral)	(pass)	(pass)	non-Wuhan districts in Hubei provinces	yes	Life-science	public health	(pass)	strongly disagree	strongly disagree	strongly disagree	strongly disagree	strongly disagree	strongly disagree	strongly disagree	strongly disagree	strongly disagree	strongly disagree	strongly disagree	strongly disagree	strongly disagree	disagree	strongly disagree	strongly disagree	strongly disagree	strongly disagree	strongly disagree	strongly disagree	strongly disagree	strongly disagree	strongly disagree	strongly disagree	completely unaffected	(pass)	(pass)	no	no	no	no	no	no	no	yes
46	2020/3/3 19:57:51	159s	female	18-24	985、211 universities	none	undergraduates	(pass)	(pass)	non-Hubei provinces	yes	Life-science	basic medicine	(pass)	strongly disagree	disagree	disagree	disagree	disagree	disagree	disagree	strongly disagree	strongly disagree	disagree	disagree	strongly disagree	disagree	disagree	strongly disagree	disagree	disagree	strongly disagree	disagree	strongly disagree	strongly disagree	disagree	disagree	strongly disagree	still under way but at a slower pace than before	laboratory facilities are closed or equipments are unavailable┋some researchers(including students) cannot attend┋difficult to obtain (experimental materials/samples) on time	feeling stress and worry	no	no	no	no	yes	yes	no	yes
47	2020/3/3 19:58:26	368s	female	25-39	university affiliated hospital	lecturer(assistant researcher, attending physician)	clinical medical staff(including postdoctoral)	(pass)	(pass)	non-Hubei provinces	no	Life-science	others	(pass)	strongly disagree	disagree	disagree	agree	strongly disagree	disagree	agree	neutral	disagree	agree	disagree	strongly disagree	disagree	strongly disagree	disagree	agree	disagree	neutral	agree	agree	neutral	strongly disagree	disagree	strongly disagree	Basically at a standstill	others	feeling stress and worry	yes	yes	yes	no	no	yes	yes	yes
48	2020/3/3 19:58:34	155s	female	18-24	985、211 universities	none	undergraduates	(pass)	(pass)	non-Hubei provinces	yes	Life-science	public health	(pass)	neutral	neutral	neutral	neutral	neutral	neutral	neutral	neutral	neutral	neutral	neutral	neutral	neutral	neutral	neutral	strongly disagree	disagree	disagree	agree	disagree	neutral	strongly agree	agree	disagree	still under way but at a slower pace than before	laboratory facilities are closed or equipments are unavailable┋some researchers(including students) cannot attend┋academic communications between co-workers have been blocked┋difficult to obtain (experimental materials/samples) on time	feeling stress and worry	no	no	no	yes	no	yes	no	yes
49	2020/3/3 19:59:56	71s	female	18-24	985、211 universities	none	undergraduates	(pass)	(pass)	non-Hubei provinces	yes	Life-science	clinical medicine	(pass)	strongly disagree	strongly disagree	strongly disagree	strongly disagree	strongly disagree	strongly disagree	strongly disagree	strongly disagree	strongly disagree	strongly disagree	strongly disagree	strongly disagree	strongly disagree	strongly disagree	strongly disagree	strongly disagree	strongly disagree	strongly disagree	strongly disagree	strongly disagree	strongly disagree	strongly disagree	strongly disagree	strongly disagree	completely unaffected	(pass)	(pass)	no	no	no	no	no	no	no	no
50	2020/3/3 20:00:55	293s	male	40-59	independent research institutes (including research institutes)	lecturer(assistant researcher, attending physician)	basic research staff(including postdoctoral)	(pass)	(pass)	non-Hubei provinces	yes	non-life science（engineering, natural science, etc.）	(pass)	applied research	strongly disagree	disagree	disagree	disagree	strongly disagree	strongly disagree	strongly disagree	strongly disagree	disagree	disagree	strongly disagree	strongly disagree	disagree	strongly disagree	disagree	strongly disagree	disagree	strongly disagree	disagree	disagree	strongly disagree	disagree	strongly disagree	strongly disagree	still under way but at a slower pace than before	some researchers(including students) cannot attend	feeling stress and worry	yes	yes	no	no	no	yes	yes	yes
51	2020/3/3 20:01:21	148s	female	18-24	985、211 universities	none	undergraduates	(pass)	(pass)	non-Hubei provinces	no	Life-science	clinical medicine	(pass)	strongly disagree	disagree	disagree	disagree	strongly disagree	disagree	disagree	disagree	disagree	disagree	strongly disagree	disagree	strongly disagree	strongly disagree	disagree	disagree	disagree	strongly disagree	disagree	strongly disagree	disagree	strongly disagree	strongly disagree	strongly disagree	Basically at a standstill	laboratory facilities are closed or equipments are unavailable┋some researchers(including students) cannot attend┋difficult to obtain (experimental materials/samples) on time	few influences to my emotion	no	no	no	no	yes	yes	no	no
52	2020/3/3 20:01:41	138s	male	25-39	985、211 universities	none	master candidate(graduate year)	well preparation	no	non-Hubei provinces	no	non-life science（engineering, natural science, etc.）	(pass)	fundamental research/theoretical research	strongly disagree	disagree	disagree	disagree	strongly disagree	strongly disagree	strongly disagree	strongly disagree	strongly disagree	strongly disagree	strongly disagree	strongly disagree	strongly disagree	disagree	disagree	disagree	disagree	disagree	strongly disagree	strongly disagree	strongly disagree	strongly disagree	strongly disagree	strongly disagree	still under way but at a slower pace than before	difficult to obtain (experimental materials/samples) on time┋others	few influences to my emotion	no	no	no	no	no	no	no	no
53	2020/3/3 20:01:54	260s	female	18-24	general college	none	undergraduates	(pass)	(pass)	non-Hubei provinces	yes	Life-science	public health	(pass)	strongly disagree	neutral	neutral	neutral	strongly disagree	agree	agree	agree	agree	disagree	disagree	strongly disagree	strongly disagree	disagree	disagree	strongly disagree	disagree	agree	agree	strongly agree	agree	strongly disagree	strongly agree	strongly disagree	completely unaffected	(pass)	(pass)	yes	yes	yes	yes	no	no	no	no
54	2020/3/3 20:02:44	130s	female	18-24	985、211 universities	none	undergraduates	(pass)	(pass)	non-Hubei provinces	yes	Life-science	clinical medicine	(pass)	strongly disagree	strongly disagree	strongly disagree	strongly disagree	strongly disagree	strongly disagree	strongly disagree	strongly disagree	strongly disagree	strongly disagree	strongly disagree	strongly disagree	strongly disagree	strongly disagree	disagree	strongly disagree	strongly disagree	strongly disagree	strongly disagree	strongly disagree	strongly disagree	strongly disagree	strongly disagree	strongly disagree	completely unaffected	(pass)	(pass)	yes	yes	no	no	yes	no	no	yes
55	2020/3/3 20:04:46	128s	female	18-24	general college	none	undergraduates	(pass)	(pass)	non-Hubei provinces	no	the humanities and social sciences	(pass)	others	disagree	disagree	disagree	disagree	disagree	disagree	disagree	disagree	disagree	neutral	disagree	disagree	disagree	disagree	disagree	strongly disagree	disagree	disagree	strongly disagree	disagree	disagree	strongly disagree	disagree	strongly disagree	completely unaffected	(pass)	(pass)	yes	yes	yes	no	no	yes	no	no
56	2020/3/3 20:07:02	300s	male	25-39	985、211 universities	professor( researcher, chief physician)	basic research staff(including postdoctoral)	(pass)	(pass)	non-Hubei provinces	yes	Life-science	others〖药学〗	(pass)	neutral	strongly disagree	strongly agree	strongly agree	strongly agree	agree	strongly agree	strongly agree	strongly agree	strongly agree	strongly agree	strongly disagree	disagree	agree	strongly agree	strongly agree	neutral	neutral	strongly agree	neutral	neutral	disagree	strongly agree	strongly disagree	Basically at a standstill	laboratory facilities are closed or equipments are unavailable┋some researchers(including students) cannot attend┋academic communications between co-workers have been blocked┋others〖实验室尚未建立，学生不积极〗	feeling stress and worry	yes	yes	no	yes	no	yes	no	yes
57	2020/3/3 20:08:08	198s	male	18-24	985、211 universities	none	undergraduates	(pass)	(pass)	non-Hubei provinces	no	Life-science	clinical medicine	(pass)	disagree	disagree	disagree	disagree	disagree	disagree	disagree	disagree	disagree	disagree	disagree	disagree	disagree	agree	agree	disagree	neutral	disagree	neutral	strongly disagree	strongly disagree	strongly disagree	agree	strongly disagree	completely unaffected	(pass)	(pass)	no	no	no	no	no	no	no	no
58	2020/3/3 20:09:30	174s	female	18-24	985、211 universities	none	undergraduates	(pass)	(pass)	non-Hubei provinces	yes	Life-science	public health	(pass)	strongly disagree	strongly disagree	disagree	disagree	strongly disagree	disagree	strongly disagree	disagree	disagree	disagree	strongly disagree	strongly disagree	disagree	strongly disagree	disagree	strongly disagree	disagree	strongly disagree	strongly disagree	strongly disagree	strongly disagree	strongly disagree	strongly disagree	strongly disagree	still under way but at a slower pace than before	academic communications between co-workers have been blocked	feeling stress and worry	yes	yes	yes	no	no	no	no	yes
59	2020/3/3 20:09:45	136s	female	18-24	985、211 universities	none	undergraduates	(pass)	(pass)	non-Hubei provinces	yes	Life-science	public health	(pass)	neutral	agree	neutral	neutral	neutral	neutral	neutral	neutral	neutral	neutral	neutral	neutral	neutral	neutral	neutral	neutral	agree	neutral	agree	neutral	agree	disagree	strongly agree	strongly disagree	completely unaffected	(pass)	(pass)	no	no	no	no	no	no	no	no
60	2020/3/3 20:10:01	165s	female	18-24	985、211 universities	none	undergraduates	(pass)	(pass)	non-Hubei provinces	no	Life-science	clinical medicine	(pass)	strongly disagree	strongly disagree	strongly disagree	neutral	strongly disagree	disagree	strongly disagree	strongly disagree	strongly disagree	disagree	strongly disagree	strongly disagree	strongly disagree	strongly disagree	strongly disagree	strongly disagree	strongly disagree	strongly disagree	neutral	strongly disagree	strongly disagree	strongly disagree	agree	strongly disagree	still under way but at a slower pace than before	some researchers(including students) cannot attend┋academic communications between co-workers have been blocked	few influences to my emotion	yes	no	no	no	no	yes	no	yes
61	2020/3/3 20:11:12	392s	male	40-59	985、211 universities	associate professor(associate researcher, associate chief physician)	basic research staff(including postdoctoral)	(pass)	(pass)	non-Hubei provinces	yes	non-life science（engineering, natural science, etc.）	(pass)	applied research	strongly disagree	disagree	strongly disagree	disagree	strongly disagree	strongly disagree	strongly disagree	strongly disagree	disagree	strongly disagree	disagree	strongly disagree	strongly disagree	strongly disagree	disagree	disagree	disagree	strongly disagree	disagree	strongly disagree	strongly disagree	strongly disagree	strongly disagree	disagree	Basically at a standstill	laboratory facilities are closed or equipments are unavailable┋some researchers(including students) cannot attend┋academic communications between co-workers have been blocked	feeling stress and worry	yes	yes	no	no	no	yes	no	yes
62	2020/3/3 20:12:23	136s	female	18-24	general college	none	undergraduates	(pass)	(pass)	non-Hubei provinces	yes	the humanities and social sciences	(pass)	applied research	neutral	disagree	disagree	disagree	disagree	disagree	disagree	disagree	disagree	disagree	disagree	disagree	disagree	neutral	disagree	neutral	strongly disagree	strongly disagree	strongly disagree	strongly disagree	strongly disagree	strongly disagree	agree	strongly disagree	still under way but at a slower pace than before	difficult to obtain (experimental materials/samples) on time	few influences to my emotion	yes	no	yes	yes	yes	yes	yes	yes
63	2020/3/3 20:12:31	427s	male	40-59	985、211 universities	associate professor(associate researcher, associate chief physician)	basic research staff(including postdoctoral)	(pass)	(pass)	non-Hubei provinces	yes	non-life science（engineering, natural science, etc.）	(pass)	fundamental research/theoretical research	strongly disagree	disagree	disagree	disagree	strongly disagree	strongly disagree	strongly disagree	strongly disagree	strongly disagree	strongly disagree	disagree	disagree	disagree	disagree	disagree	disagree	disagree	strongly disagree	disagree	strongly disagree	strongly disagree	disagree	disagree	disagree	Basically at a standstill	laboratory facilities are closed or equipments are unavailable┋some researchers(including students) cannot attend┋difficult to obtain (experimental materials/samples) on time	feeling stress and worry	no	no	no	no	no	yes	no	yes
64	2020/3/3 20:27:03	225s	male	18-24	985、211 universities	none	PhD candidate(non-graduate year)	(pass)	(pass)	non-Hubei provinces	yes	non-life science（engineering, natural science, etc.）	(pass)	fundamental research/theoretical research	disagree	agree	disagree	disagree	strongly disagree	disagree	strongly disagree	disagree	disagree	disagree	neutral	disagree	neutral	disagree	disagree	disagree	disagree	strongly disagree	strongly disagree	strongly disagree	neutral	strongly disagree	strongly disagree	strongly disagree	Basically at a standstill	laboratory facilities are closed or equipments are unavailable┋some researchers(including students) cannot attend	feeling stress and worry	yes	yes	yes	no	no	no	no	yes
65	2020/3/3 20:27:11	186s	male	18-24	985、211 universities	none	undergraduates	(pass)	(pass)	non-Hubei provinces	yes	the humanities and social sciences	(pass)	applied research	strongly disagree	neutral	neutral	neutral	strongly disagree	disagree	strongly disagree	strongly disagree	strongly disagree	strongly disagree	strongly disagree	agree	agree	agree	strongly disagree	strongly disagree	disagree	strongly disagree	strongly disagree	strongly disagree	disagree	strongly disagree	strongly agree	strongly disagree	still under way but at a slower pace than before	academic communications between co-workers have been blocked	feeling stress and worry	yes	yes	yes	no	no	yes	yes	yes
66	2020/3/3 20:27:42	294s	male	25-39	985、211 universities	none	PhD candidate(non-graduate year)	(pass)	(pass)	non-Hubei provinces	no	non-life science（engineering, natural science, etc.）	(pass)	fundamental research/theoretical research	strongly disagree	strongly disagree	strongly disagree	disagree	strongly disagree	strongly disagree	disagree	disagree	disagree	strongly disagree	strongly disagree	disagree	strongly disagree	strongly disagree	disagree	neutral	strongly disagree	disagree	disagree	neutral	disagree	strongly disagree	neutral	strongly disagree	still under way but at a slower pace than before	academic communications between co-workers have been blocked┋others〖在家懈怠〗	few influences to my emotion	yes	yes	no	no	no	no	no	yes
67	2020/3/3 20:28:09	176s	male	18-24	independent research institutes (including research institutes)	none	PhD candidate(non-graduate year)	(pass)	(pass)	non-Hubei provinces	yes	non-life science（engineering, natural science, etc.）	(pass)	fundamental research/theoretical research	strongly disagree	disagree	disagree	strongly disagree	strongly disagree	strongly disagree	disagree	strongly disagree	strongly disagree	strongly disagree	strongly disagree	strongly disagree	strongly disagree	strongly disagree	strongly disagree	strongly disagree	strongly disagree	strongly disagree	strongly disagree	strongly disagree	strongly disagree	disagree	neutral	strongly disagree	Basically at a standstill	laboratory facilities are closed or equipments are unavailable	feeling stress and worry	yes	yes	no	yes	yes	yes	yes	yes
68	2020/3/3 20:28:40	195s	female	18-24	general college	none	undergraduates	(pass)	(pass)	Wuhan	no	non-life science（engineering, natural science, etc.）	(pass)	fundamental research/theoretical research	neutral	agree	strongly agree	neutral	neutral	agree	neutral	disagree	disagree	disagree	neutral	strongly disagree	strongly disagree	disagree	strongly disagree	strongly disagree	neutral	disagree	disagree	neutral	strongly disagree	disagree	neutral	strongly disagree	completely unaffected	(pass)	(pass)	yes	yes	yes	no	no	yes	yes	no
69	2020/3/3 20:34:46	332s	male	18-24	985、211 universities	none	undergraduates	(pass)	(pass)	non-Hubei provinces	yes	Life-science	clinical medicine	(pass)	disagree	disagree	strongly disagree	disagree	disagree	strongly disagree	strongly disagree	strongly disagree	strongly disagree	strongly disagree	strongly disagree	strongly disagree	disagree	strongly disagree	disagree	strongly disagree	disagree	disagree	strongly disagree	disagree	disagree	disagree	disagree	disagree	completely unaffected	(pass)	(pass)	no	no	no	no	no	no	no	no
70	2020/3/3 20:36:28	113s	female	18-24	985、211 universities	none	undergraduates	(pass)	(pass)	non-Hubei provinces	yes	Life-science	basic medicine	(pass)	strongly disagree	strongly disagree	strongly disagree	strongly agree	strongly disagree	strongly disagree	strongly disagree	strongly disagree	strongly disagree	strongly disagree	strongly disagree	strongly disagree	strongly disagree	agree	strongly disagree	strongly disagree	neutral	strongly disagree	strongly disagree	strongly disagree	strongly disagree	strongly disagree	strongly disagree	strongly disagree	completely unaffected	(pass)	(pass)	no	no	no	no	no	no	no	yes
71	2020/3/3 20:37:48	303s	female	25-39	985、211 universities	lecturer(assistant researcher, attending physician)	basic research staff(including postdoctoral)	(pass)	(pass)	non-Hubei provinces	yes	the humanities and social sciences	(pass)	others	strongly disagree	strongly disagree	strongly disagree	strongly disagree	strongly disagree	strongly disagree	strongly disagree	strongly disagree	strongly disagree	strongly disagree	strongly disagree	strongly disagree	strongly disagree	strongly disagree	strongly disagree	strongly disagree	strongly disagree	strongly disagree	strongly disagree	strongly disagree	strongly disagree	strongly disagree	strongly disagree	strongly disagree	Basically at a standstill	some researchers(including students) cannot attend	few influences to my emotion	yes	no	no	no	no	yes	no	yes
72	2020/3/3 20:46:07	345s	female	40-59	985、211 universities	associate professor(associate researcher, associate chief physician)	basic research staff(including postdoctoral)	(pass)	(pass)	non-Hubei provinces	no	the humanities and social sciences	(pass)	others	strongly disagree	strongly disagree	strongly disagree	strongly disagree	strongly disagree	strongly disagree	strongly disagree	strongly disagree	strongly disagree	strongly disagree	strongly disagree	strongly disagree	strongly disagree	strongly disagree	disagree	strongly disagree	strongly disagree	strongly disagree	disagree	strongly disagree	strongly disagree	strongly disagree	strongly disagree	strongly disagree	completely unaffected	(pass)	(pass)	no	no	no	no	no	no	no	no
73	2020/3/3 20:47:06	195s	female	25-39	general college	none	undergraduates	(pass)	(pass)	non-Hubei provinces	no	others	(pass)	others	strongly disagree	strongly disagree	strongly disagree	strongly disagree	strongly disagree	strongly disagree	strongly disagree	strongly disagree	strongly disagree	strongly disagree	strongly disagree	strongly disagree	strongly disagree	strongly disagree	strongly disagree	strongly disagree	strongly disagree	strongly disagree	strongly disagree	strongly disagree	strongly disagree	strongly disagree	strongly disagree	strongly disagree	completely unaffected	(pass)	(pass)	yes	yes	yes	yes	yes	yes	yes	yes
74	2020/3/3 20:48:47	493s	female	18-24	985、211 universities	none	undergraduates	(pass)	(pass)	non-Hubei provinces	yes	non-life science（engineering, natural science, etc.）	(pass)	fundamental research/theoretical research	neutral	neutral	neutral	agree	disagree	neutral	neutral	disagree	neutral	neutral	agree	disagree	disagree	agree	neutral	disagree	disagree	agree	disagree	neutral	neutral	strongly disagree	strongly agree	strongly disagree	Basically at a standstill	laboratory facilities are closed or equipments are unavailable┋some researchers(including students) cannot attend┋academic communications between co-workers have been blocked┋difficult to obtain (experimental materials/samples) on time	feeling stress and worry	yes	yes	yes	yes	no	yes	no	yes
75	2020/3/3 20:49:45	213s	female	18-24	985、211 universities	none	undergraduates	(pass)	(pass)	non-Hubei provinces	yes	Life-science	clinical medicine	(pass)	agree	agree	neutral	neutral	agree	neutral	neutral	neutral	neutral	agree	agree	neutral	strongly agree	strongly disagree	agree	agree	agree	agree	neutral	strongly disagree	disagree	disagree	strongly disagree	strongly disagree	still under way but at a slower pace than before	laboratory facilities are closed or equipments are unavailable┋some researchers(including students) cannot attend	feeling stress and worry	no	no	no	no	no	no	yes	no
76	2020/3/3 20:49:53	182s	female	25-39	university affiliated hospital	lecturer(assistant researcher, attending physician)	clinical medical staff(including postdoctoral)	(pass)	(pass)	non-Hubei provinces	no	Life-science	clinical medicine	(pass)	disagree	neutral	neutral	neutral	disagree	disagree	disagree	disagree	disagree	neutral	neutral	disagree	disagree	disagree	disagree	neutral	neutral	disagree	disagree	disagree	disagree	disagree	disagree	strongly disagree	completely unaffected	(pass)	(pass)	no	no	no	no	no	no	no	no
77	2020/3/3 20:50:44	110s	male	18-24	985、211 universities	none	undergraduates	(pass)	(pass)	non-Hubei provinces	yes	Life-science	clinical medicine	(pass)	strongly disagree	strongly disagree	strongly disagree	strongly disagree	strongly disagree	strongly disagree	strongly disagree	strongly disagree	strongly disagree	strongly disagree	strongly disagree	strongly disagree	disagree	disagree	neutral	neutral	disagree	neutral	disagree	neutral	disagree	neutral	strongly agree	strongly disagree	still under way but at a slower pace than before	laboratory facilities are closed or equipments are unavailable┋some researchers(including students) cannot attend┋academic communications between co-workers have been blocked┋difficult to obtain (experimental materials/samples) on time	feeling stress and worry	yes	yes	no	yes	yes	no	no	yes
78	2020/3/3 20:51:52	264s	female	25-39	985、211 universities	none	PhD candidate(graduate year)	(pass)	(pass)	non-Hubei provinces	yes	Life-science	clinical medicine	(pass)	strongly disagree	strongly disagree	strongly disagree	strongly disagree	strongly disagree	strongly disagree	strongly disagree	strongly disagree	strongly disagree	strongly disagree	strongly disagree	strongly disagree	strongly disagree	strongly disagree	strongly disagree	strongly disagree	strongly disagree	strongly disagree	strongly disagree	strongly disagree	strongly disagree	strongly disagree	strongly disagree	strongly disagree	Basically at a standstill	laboratory facilities are closed or equipments are unavailable┋others〖不让返校〗	feeling stress and worry	yes	yes	no	no	no	yes	yes	yes
79	2020/3/3 20:55:08	167s	female	18-24	985、211 universities	none	undergraduates	(pass)	(pass)	non-Hubei provinces	yes	Life-science	basic medicine	(pass)	strongly disagree	strongly disagree	strongly disagree	neutral	strongly disagree	strongly disagree	strongly disagree	strongly disagree	strongly disagree	strongly disagree	strongly disagree	strongly disagree	agree	agree	strongly disagree	strongly disagree	agree	neutral	strongly disagree	disagree	neutral	neutral	strongly agree	strongly disagree	Basically at a standstill	laboratory facilities are closed or equipments are unavailable┋some researchers(including students) cannot attend┋difficult to obtain (experimental materials/samples) on time	few influences to my emotion	yes	yes	yes	yes	no	no	no	yes
80	2020/3/3 20:56:24	120s	female	18-24	university affiliated hospital	none	undergraduates	(pass)	(pass)	non-Hubei provinces	no	Life-science	clinical medicine	(pass)	strongly agree	strongly agree	strongly agree	strongly agree	strongly agree	strongly agree	strongly agree	strongly agree	strongly agree	strongly agree	strongly agree	strongly agree	strongly agree	strongly agree	strongly disagree	strongly agree	strongly agree	strongly agree	strongly agree	strongly agree	strongly agree	strongly disagree	strongly agree	strongly disagree	Basically at a standstill	some researchers(including students) cannot attend	few influences to my emotion	yes	yes	yes	no	yes	yes	no	yes
81	2020/3/3 21:00:58	100s	female	25-39	university affiliated hospital	lecturer(assistant researcher, attending physician)	clinical medical staff(including postdoctoral)	(pass)	(pass)	non-Hubei provinces	yes	Life-science	clinical medicine	(pass)	strongly disagree	strongly disagree	strongly disagree	strongly disagree	strongly disagree	strongly disagree	strongly disagree	strongly disagree	disagree	strongly disagree	disagree	strongly disagree	strongly disagree	strongly disagree	strongly disagree	strongly disagree	strongly disagree	strongly disagree	strongly disagree	strongly disagree	strongly disagree	strongly disagree	strongly disagree	strongly disagree	Basically at a standstill	laboratory facilities are closed or equipments are unavailable┋difficult to obtain (experimental materials/samples) on time	few influences to my emotion	no	no	no	no	no	no	no	no
82	2020/3/3 21:02:13	225s	female	40-59	985、211 universities	professor( researcher, chief physician)	basic research staff(including postdoctoral)	(pass)	(pass)	non-Hubei provinces	yes	Life-science	public health	(pass)	neutral	strongly disagree	strongly disagree	disagree	strongly disagree	strongly disagree	strongly disagree	strongly disagree	disagree	strongly disagree	strongly disagree	disagree	disagree	strongly disagree	strongly disagree	strongly disagree	strongly disagree	strongly disagree	strongly disagree	strongly disagree	strongly disagree	strongly disagree	strongly disagree	strongly disagree	still under way but at a slower pace than before	some researchers(including students) cannot attend	feeling stress and worry	no	no	no	no	no	no	no	no
83	2020/3/3 21:05:04	295s	male	25-39	university affiliated hospital	lecturer(assistant researcher, attending physician)	PhD candidate(graduate year)	(pass)	(pass)	non-Hubei provinces	yes	Life-science	clinical medicine	(pass)	disagree	disagree	disagree	disagree	strongly disagree	disagree	disagree	disagree	disagree	disagree	strongly disagree	strongly disagree	agree	neutral	neutral	neutral	neutral	disagree	agree	disagree	disagree	disagree	neutral	neutral	still under way but at a slower pace than before	laboratory facilities are closed or equipments are unavailable┋some researchers(including students) cannot attend┋academic communications between co-workers have been blocked┋difficult to obtain (experimental materials/samples) on time	feeling stress and worry	yes	yes	no	yes	yes	yes	yes	yes
84	2020/3/3 21:11:16	139s	male	18-24	985、211 universities	none	PhD candidate(non-graduate year)	(pass)	(pass)	non-Hubei provinces	yes	Life-science	basic medicine	(pass)	strongly agree	strongly agree	strongly agree	strongly agree	strongly agree	strongly agree	strongly agree	strongly agree	strongly agree	strongly agree	strongly agree	strongly agree	strongly agree	strongly agree	strongly agree	strongly agree	strongly agree	agree	agree	agree	strongly agree	strongly disagree	strongly agree	agree	Basically at a standstill	academic communications between co-workers have been blocked	feeling about to collapse	yes	yes	yes	yes	no	yes	no	yes
85	2020/3/3 21:16:21	53s	female	≥60	non-university affiliated hospital	none	undergraduates	(pass)	(pass)	non-Wuhan districts in Hubei provinces	no	Life-science	public health	(pass)	strongly disagree	strongly disagree	strongly disagree	strongly disagree	strongly disagree	strongly disagree	strongly disagree	strongly disagree	strongly disagree	strongly disagree	strongly disagree	strongly disagree	strongly disagree	strongly disagree	strongly disagree	strongly disagree	strongly disagree	strongly disagree	strongly disagree	strongly disagree	strongly disagree	strongly disagree	strongly disagree	strongly disagree	completely unaffected	(pass)	(pass)	yes	yes	yes	yes	yes	yes	yes	yes
86	2020/3/3 21:18:45	181s	female	18-24	985、211 universities	none	master candidate(non-graduate year)	not yet	no	non-Hubei provinces	no	non-life science（engineering, natural science, etc.）	(pass)	fundamental research/theoretical research	strongly disagree	strongly disagree	strongly disagree	strongly disagree	strongly disagree	strongly disagree	strongly disagree	strongly disagree	strongly disagree	strongly disagree	strongly disagree	strongly disagree	strongly disagree	strongly disagree	strongly disagree	strongly disagree	strongly disagree	strongly disagree	strongly disagree	strongly disagree	strongly disagree	strongly disagree	strongly disagree	strongly disagree	Basically at a standstill	laboratory facilities are closed or equipments are unavailable┋some researchers(including students) cannot attend┋difficult to obtain (experimental materials/samples) on time	few influences to my emotion	yes	no	no	no	no	no	no	no
87	2020/3/3 21:29:12	123s	male	18-24	985、211 universities	none	master candidate(graduate year)	inadequate preparation	yes	non-Hubei provinces	yes	Life-science	basic medicine	(pass)	agree	strongly agree	strongly agree	strongly agree	neutral	strongly agree	agree	strongly agree	strongly agree	strongly agree	strongly agree	strongly agree	strongly agree	strongly agree	agree	strongly agree	strongly agree	agree	strongly agree	neutral	agree	neutral	strongly agree	disagree	Basically at a standstill	laboratory facilities are closed or equipments are unavailable┋some researchers(including students) cannot attend┋academic communications between co-workers have been blocked┋difficult to obtain (experimental materials/samples) on time	feeling stress and worry	yes	yes	yes	yes	yes	yes	yes	yes
88	2020/3/3 21:39:53	240s	male	25-39	985、211 universities	none	PhD candidate(graduate year)	(pass)	(pass)	non-Hubei provinces	yes	others〖工程〗	(pass)	fundamental research/theoretical research	disagree	disagree	disagree	neutral	disagree	disagree	disagree	disagree	disagree	disagree	disagree	neutral	neutral	agree	agree	strongly agree	agree	neutral	disagree	disagree	disagree	agree	agree	strongly agree	still under way but at a slower pace than before	laboratory facilities are closed or equipments are unavailable┋some researchers(including students) cannot attend	feeling stress and worry	yes	yes	no	no	no	no	no	yes
89	2020/3/3 21:40:21	121s	male	18-24	general college	none	undergraduates	(pass)	(pass)	non-Hubei provinces	no	Life-science	public health	(pass)	agree	disagree	agree	agree	disagree	agree	disagree	agree	disagree	agree	disagree	agree	agree	neutral	agree	neutral	neutral	agree	neutral	strongly agree	disagree	disagree	agree	neutral	still under way but at a slower pace than before	others	few influences to my emotion	no	no	no	no	yes	no	no	yes
90	2020/3/3 21:45:12	124s	female	18-24	985、211 universities	none	undergraduates	(pass)	(pass)	non-Hubei provinces	no	the humanities and social sciences	(pass)	fundamental research/theoretical research	disagree	disagree	disagree	disagree	disagree	disagree	disagree	disagree	disagree	disagree	disagree	disagree	disagree	strongly disagree	strongly disagree	disagree	disagree	disagree	disagree	disagree	disagree	disagree	disagree	disagree	completely unaffected	(pass)	(pass)	yes	yes	yes	yes	yes	yes	yes	yes
91	2020/3/3 22:31:23	188s	female	25-39	985、211 universities	none	master candidate(graduate year)	inadequate preparation	no	non-Hubei provinces	no	others	(pass)	others	disagree	disagree	disagree	disagree	disagree	disagree	disagree	disagree	disagree	disagree	disagree	disagree	disagree	disagree	disagree	disagree	disagree	disagree	disagree	disagree	strongly disagree	strongly disagree	neutral	strongly agree	still under way but at a slower pace than before	laboratory facilities are closed or equipments are unavailable┋some researchers(including students) cannot attend	feeling stress and worry	yes	yes	yes	yes	yes	yes	yes	yes
92	2020/3/3 23:05:48	260s	female	40-59	general college	professor( researcher, chief physician)	basic research staff(including postdoctoral)	(pass)	(pass)	non-Hubei provinces	yes	Life-science	basic medicine	(pass)	disagree	disagree	disagree	disagree	strongly disagree	disagree	disagree	disagree	disagree	disagree	neutral	disagree	disagree	neutral	neutral	disagree	disagree	disagree	disagree	disagree	disagree	strongly disagree	disagree	disagree	still under way but at a slower pace than before	laboratory facilities are closed or equipments are unavailable┋some researchers(including students) cannot attend	few influences to my emotion	yes	no	no	yes	no	yes	yes	yes
93	2020/3/3 23:29:20	124s	male	18-24	general college	none	undergraduates	(pass)	(pass)	non-Hubei provinces	no	others	(pass)	others	strongly disagree	agree	neutral	neutral	neutral	neutral	disagree	disagree	neutral	neutral	neutral	disagree	disagree	agree	agree	disagree	disagree	disagree	agree	disagree	disagree	disagree	neutral	strongly disagree	completely unaffected	(pass)	(pass)	yes	yes	yes	yes	yes	yes	yes	yes
94	2020/3/4 0:02:16	175s	male	25-39	985、211 universities	associate professor(associate researcher, associate chief physician)	clinical medical staff(including postdoctoral)	(pass)	(pass)	non-Hubei provinces	yes	Life-science	basic medicine	(pass)	strongly disagree	disagree	disagree	disagree	strongly disagree	disagree	strongly disagree	strongly disagree	strongly disagree	disagree	strongly disagree	disagree	disagree	disagree	disagree	disagree	disagree	strongly disagree	disagree	disagree	disagree	strongly disagree	disagree	strongly disagree	still under way but at a slower pace than before	laboratory facilities are closed or equipments are unavailable┋some researchers(including students) cannot attend┋difficult to obtain (experimental materials/samples) on time	few influences to my emotion	yes	no	no	no	yes	no	no	no
95	2020/3/4 0:02:36	189s	female	25-39	university affiliated hospital	none	clinical medical staff(including postdoctoral)	(pass)	(pass)	non-Hubei provinces	no	Life-science	basic medicine	(pass)	neutral	strongly disagree	agree	agree	neutral	neutral	disagree	neutral	neutral	neutral	neutral	neutral	strongly disagree	strongly disagree	strongly disagree	strongly disagree	neutral	neutral	strongly disagree	strongly disagree	neutral	strongly disagree	strongly agree	strongly disagree	Basically at a standstill	others	feeling stress and worry	no	yes	yes	yes	no	yes	yes	yes
96	2020/3/4 0:02:45	146s	female	25-39	university affiliated hospital	none	clinical medical staff(including postdoctoral)	(pass)	(pass)	non-Hubei provinces	no	Life-science	clinical medicine	(pass)	strongly disagree	strongly disagree	strongly disagree	disagree	strongly disagree	disagree	strongly disagree	strongly disagree	disagree	strongly disagree	disagree	strongly disagree	strongly disagree	disagree	disagree	neutral	strongly disagree	strongly disagree	strongly disagree	strongly disagree	strongly disagree	strongly disagree	disagree	strongly disagree	Basically at a standstill	laboratory facilities are closed or equipments are unavailable┋some researchers(including students) cannot attend┋difficult to obtain (experimental materials/samples) on time	feeling stress and worry	yes	yes	no	no	no	no	no	yes
97	2020/3/4 0:02:48	173s	male	25-39	985、211 universities	none	PhD candidate(graduate year)	(pass)	(pass)	non-Hubei provinces	yes	Life-science	clinical medicine	(pass)	disagree	strongly agree	neutral	neutral	agree	agree	neutral	neutral	neutral	agree	neutral	neutral	strongly agree	agree	agree	agree	strongly agree	disagree	strongly agree	disagree	disagree	disagree	strongly agree	strongly disagree	Basically at a standstill	academic communications between co-workers have been blocked┋difficult to obtain (experimental materials/samples) on time	feeling about to collapse	yes	yes	yes	yes	yes	yes	yes	yes
98	2020/3/4 0:03:39	215s	female	25-39	985、211 universities	none	basic research staff(including postdoctoral)	(pass)	(pass)	non-Hubei provinces	yes	non-life science（engineering, natural science, etc.）	(pass)	fundamental research/theoretical research	strongly disagree	disagree	neutral	agree	strongly disagree	strongly disagree	disagree	disagree	disagree	strongly disagree	strongly disagree	neutral	neutral	agree	agree	strongly disagree	disagree	agree	strongly disagree	disagree	neutral	disagree	neutral	strongly disagree	Basically at a standstill	laboratory facilities are closed or equipments are unavailable┋difficult to obtain (experimental materials/samples) on time	few influences to my emotion	no	no	no	no	no	yes	no	no
99	2020/3/4 0:03:42	256s	male	25-39	985、211 universities	none	clinical medical staff(including postdoctoral)	(pass)	(pass)	non-Hubei provinces	no	Life-science	clinical medicine	(pass)	disagree	disagree	disagree	disagree	disagree	strongly disagree	strongly disagree	strongly disagree	disagree	disagree	disagree	strongly disagree	disagree	strongly disagree	strongly disagree	strongly disagree	disagree	strongly disagree	disagree	disagree	disagree	strongly disagree	disagree	strongly disagree	still under way but at a slower pace than before	academic communications between co-workers have been blocked┋difficult to obtain (experimental materials/samples) on time	few influences to my emotion	yes	yes	no	no	no	yes	yes	yes
100	2020/3/4 0:03:54	195s	female	25-39	985、211 universities	lecturer(assistant researcher, attending physician)	clinical medical staff(including postdoctoral)	(pass)	(pass)	non-Hubei provinces	yes	Life-science	basic medicine	(pass)	strongly disagree	strongly disagree	strongly disagree	disagree	strongly disagree	strongly disagree	strongly disagree	strongly disagree	disagree	strongly disagree	disagree	strongly disagree	strongly disagree	disagree	disagree	strongly disagree	disagree	disagree	disagree	strongly disagree	strongly disagree	strongly disagree	strongly disagree	strongly disagree	Basically at a standstill	laboratory facilities are closed or equipments are unavailable┋some researchers(including students) cannot attend┋difficult to obtain (experimental materials/samples) on time	few influences to my emotion	no	no	no	no	no	yes	no	no
101	2020/3/4 0:04:23	236s	male	25-39	university affiliated hospital	lecturer(assistant researcher, attending physician)	clinical medical staff(including postdoctoral)	(pass)	(pass)	non-Hubei provinces	yes	Life-science	basic medicine	(pass)	strongly disagree	disagree	disagree	neutral	disagree	disagree	disagree	disagree	disagree	disagree	disagree	disagree	neutral	strongly disagree	strongly disagree	strongly disagree	disagree	disagree	strongly agree	disagree	neutral	neutral	neutral	strongly disagree	Basically at a standstill	laboratory facilities are closed or equipments are unavailable	few influences to my emotion	no	yes	no	yes	no	yes	yes	yes
102	2020/3/4 0:04:32	111s	male	25-39	university affiliated hospital	none	clinical medical staff(including postdoctoral)	(pass)	(pass)	non-Hubei provinces	yes	others	(pass)	others	strongly disagree	strongly disagree	strongly disagree	strongly disagree	strongly disagree	strongly disagree	strongly disagree	strongly disagree	strongly disagree	disagree	strongly disagree	strongly disagree	strongly disagree	strongly disagree	disagree	disagree	strongly disagree	strongly disagree	strongly disagree	strongly disagree	disagree	strongly disagree	neutral	strongly disagree	completely unaffected	(pass)	(pass)	no	no	no	no	no	no	no	no
103	2020/3/4 0:05:19	155s	female	25-39	university affiliated hospital	lecturer(assistant researcher, attending physician)	clinical medical staff(including postdoctoral)	(pass)	(pass)	non-Hubei provinces	yes	Life-science	clinical medicine	(pass)	disagree	strongly disagree	disagree	disagree	strongly disagree	disagree	disagree	disagree	disagree	disagree	disagree	strongly disagree	strongly disagree	strongly disagree	neutral	strongly disagree	disagree	disagree	disagree	disagree	strongly disagree	strongly disagree	strongly disagree	strongly disagree	Basically at a standstill	some researchers(including students) cannot attend	feeling stress and worry	yes	yes	yes	yes	yes	yes	yes	yes
104	2020/3/4 0:07:15	104s	female	18-24	university affiliated hospital	none	PhD candidate(non-graduate year)	(pass)	(pass)	non-Hubei provinces	no	Life-science	clinical medicine	(pass)	strongly agree	strongly agree	strongly agree	strongly agree	strongly agree	strongly agree	strongly agree	agree	agree	agree	strongly agree	agree	strongly agree	strongly agree	strongly agree	agree	strongly agree	strongly agree	agree	neutral	neutral	neutral	neutral	strongly disagree	completely unaffected	(pass)	(pass)	yes	yes	yes	yes	yes	yes	yes	yes
105	2020/3/4 0:08:37	156s	female	25-39	985、211 universities	none	clinical medical staff(including postdoctoral)	(pass)	(pass)	non-Hubei provinces	no	Life-science	clinical medicine	(pass)	neutral	disagree	neutral	neutral	strongly disagree	disagree	disagree	strongly disagree	disagree	disagree	disagree	strongly disagree	strongly disagree	strongly disagree	strongly disagree	strongly disagree	strongly disagree	disagree	disagree	disagree	strongly disagree	strongly disagree	agree	strongly disagree	completely unaffected	(pass)	(pass)	yes	yes	no	no	no	yes	no	no
106	2020/3/4 0:09:47	311s	female	25-39	985、211 universities	none	PhD candidate(non-graduate year)	(pass)	(pass)	non-Hubei provinces	yes	Life-science	basic medicine	(pass)	disagree	disagree	neutral	agree	disagree	neutral	neutral	neutral	agree	neutral	agree	disagree	neutral	agree	disagree	neutral	neutral	disagree	neutral	neutral	neutral	agree	agree	strongly disagree	Basically at a standstill	laboratory facilities are closed or equipments are unavailable┋some researchers(including students) cannot attend┋academic communications between co-workers have been blocked┋difficult to obtain (experimental materials/samples) on time	feeling stress and worry	yes	yes	no	yes	yes	yes	yes	yes
107	2020/3/4 0:10:02	312s	female	25-39	university affiliated hospital	lecturer(assistant researcher, attending physician)	clinical medical staff(including postdoctoral)	(pass)	(pass)	non-Hubei provinces	no	others	(pass)	others	neutral	agree	neutral	agree	strongly disagree	disagree	strongly disagree	disagree	disagree	strongly disagree	neutral	neutral	disagree	agree	strongly disagree	strongly disagree	neutral	agree	disagree	agree	neutral	agree	strongly agree	strongly disagree	still under way but at a slower pace than before	others	feeling stress and worry	yes	yes	no	no	no	no	no	yes
108	2020/3/4 0:11:34	286s	female	25-39	985、211 universities	none	PhD candidate(graduate year)	(pass)	(pass)	non-Hubei provinces	no	Life-science	basic medicine	(pass)	strongly disagree	strongly disagree	neutral	neutral	disagree	strongly disagree	disagree	disagree	disagree	strongly disagree	disagree	neutral	disagree	neutral	strongly disagree	disagree	disagree	disagree	strongly disagree	strongly disagree	strongly disagree	strongly disagree	strongly disagree	strongly disagree	Basically at a standstill	laboratory facilities are closed or equipments are unavailable┋some researchers(including students) cannot attend┋academic communications between co-workers have been blocked	feeling stress and worry	yes	no	no	yes	yes	yes	no	yes
109	2020/3/4 0:13:01	186s	female	25-39	985、211 universities	lecturer(assistant researcher, attending physician)	clinical medical staff(including postdoctoral)	(pass)	(pass)	non-Hubei provinces	yes	Life-science	clinical medicine	(pass)	disagree	disagree	neutral	neutral	disagree	disagree	disagree	strongly disagree	disagree	disagree	disagree	disagree	disagree	agree	agree	neutral	neutral	strongly disagree	disagree	strongly disagree	disagree	disagree	disagree	strongly disagree	completely unaffected	(pass)	(pass)	yes	yes	yes	yes	yes	yes	yes	yes
110	2020/3/4 0:13:46	194s	female	25-39	university affiliated hospital	none	clinical medical staff(including postdoctoral)	(pass)	(pass)	non-Hubei provinces	no	Life-science	clinical medicine	(pass)	strongly disagree	strongly disagree	strongly disagree	disagree	strongly disagree	disagree	strongly disagree	strongly disagree	strongly disagree	disagree	disagree	strongly disagree	disagree	strongly disagree	disagree	disagree	strongly disagree	strongly disagree	strongly disagree	strongly disagree	strongly disagree	strongly disagree	strongly disagree	strongly disagree	Basically at a standstill	laboratory facilities are closed or equipments are unavailable┋academic communications between co-workers have been blocked┋difficult to obtain (experimental materials/samples) on time	feeling stress and worry	yes	yes	no	no	no	yes	no	yes
111	2020/3/4 0:14:39	200s	female	25-39	985、211 universities	none	PhD candidate(graduate year)	(pass)	(pass)	non-Hubei provinces	no	Life-science	clinical medicine	(pass)	disagree	disagree	disagree	neutral	disagree	disagree	disagree	disagree	disagree	disagree	neutral	disagree	disagree	disagree	disagree	disagree	disagree	disagree	disagree	disagree	disagree	disagree	disagree	strongly disagree	completely unaffected	(pass)	(pass)	yes	yes	no	no	no	yes	no	no
112	2020/3/4 0:19:31	187s	male	25-39	985、211 universities	lecturer(assistant researcher, attending physician)	clinical medical staff(including postdoctoral)	(pass)	(pass)	non-Hubei provinces	no	Life-science	clinical medicine	(pass)	strongly disagree	disagree	disagree	strongly disagree	strongly disagree	strongly disagree	strongly disagree	strongly disagree	strongly disagree	strongly disagree	strongly disagree	strongly disagree	disagree	disagree	strongly disagree	strongly disagree	disagree	strongly disagree	strongly disagree	strongly disagree	strongly disagree	strongly disagree	disagree	strongly disagree	Basically at a standstill	laboratory facilities are closed or equipments are unavailable┋difficult to obtain (experimental materials/samples) on time	few influences to my emotion	no	no	no	no	no	yes	no	no
113	2020/3/4 0:19:37	152s	female	25-39	university affiliated hospital	lecturer(assistant researcher, attending physician)	clinical medical staff(including postdoctoral)	(pass)	(pass)	non-Hubei provinces	no	Life-science	others	(pass)	neutral	neutral	neutral	neutral	strongly disagree	disagree	disagree	disagree	disagree	strongly disagree	disagree	strongly disagree	strongly disagree	strongly disagree	neutral	strongly disagree	strongly disagree	strongly disagree	strongly disagree	strongly disagree	strongly disagree	strongly disagree	neutral	strongly disagree	Basically at a standstill	laboratory facilities are closed or equipments are unavailable	feeling stress and worry	yes	yes	no	no	no	yes	no	no
114	2020/3/4 0:19:44	73s	male	25-39	985、211 universities	none	basic research staff(including postdoctoral)	(pass)	(pass)	non-Hubei provinces	yes	Life-science	clinical medicine	(pass)	disagree	disagree	disagree	disagree	disagree	disagree	disagree	disagree	disagree	disagree	disagree	disagree	disagree	disagree	disagree	disagree	disagree	disagree	disagree	disagree	disagree	disagree	disagree	disagree	completely unaffected	(pass)	(pass)	no	no	no	no	no	no	no	no
115	2020/3/4 0:21:07	156s	female	25-39	university affiliated hospital	none	PhD candidate(graduate year)	(pass)	(pass)	non-Hubei provinces	yes	Life-science	clinical medicine	(pass)	neutral	agree	neutral	strongly agree	agree	disagree	neutral	strongly disagree	neutral	disagree	neutral	strongly disagree	strongly disagree	strongly disagree	strongly disagree	strongly disagree	disagree	disagree	strongly disagree	neutral	strongly disagree	disagree	disagree	strongly disagree	completely unaffected	(pass)	(pass)	yes	yes	no	no	no	no	no	yes
116	2020/3/4 0:26:29	134s	male	25-39	985、211 universities	lecturer(assistant researcher, attending physician)	clinical medical staff(including postdoctoral)	(pass)	(pass)	non-Hubei provinces	yes	Life-science	basic medicine	(pass)	disagree	disagree	disagree	disagree	disagree	disagree	strongly disagree	strongly disagree	disagree	strongly disagree	strongly disagree	strongly disagree	disagree	disagree	strongly disagree	strongly disagree	strongly disagree	strongly disagree	strongly disagree	strongly disagree	strongly disagree	strongly disagree	strongly disagree	strongly disagree	Basically at a standstill	laboratory facilities are closed or equipments are unavailable┋some researchers(including students) cannot attend┋difficult to obtain (experimental materials/samples) on time	feeling stress and worry	yes	yes	yes	yes	yes	yes	no	no
117	2020/3/4 0:26:54	216s	male	25-39	985、211 universities	professor( researcher, chief physician)	basic research staff(including postdoctoral)	(pass)	(pass)	non-Hubei provinces	yes	Life-science	basic medicine	(pass)	strongly disagree	strongly disagree	disagree	disagree	strongly disagree	strongly disagree	strongly disagree	strongly disagree	disagree	disagree	neutral	strongly disagree	strongly disagree	strongly disagree	strongly disagree	disagree	disagree	strongly disagree	strongly disagree	strongly disagree	strongly disagree	strongly disagree	disagree	strongly disagree	still under way but at a slower pace than before	laboratory facilities are closed or equipments are unavailable┋difficult to obtain (experimental materials/samples) on time	feeling stress and worry	yes	no	no	no	yes	yes	yes	yes
118	2020/3/4 0:32:26	207s	female	25-39	985、211 universities	lecturer(assistant researcher, attending physician)	clinical medical staff(including postdoctoral)	(pass)	(pass)	non-Hubei provinces	yes	Life-science	basic medicine	(pass)	disagree	disagree	disagree	disagree	disagree	strongly disagree	disagree	disagree	disagree	strongly disagree	disagree	neutral	strongly disagree	agree	strongly disagree	strongly disagree	strongly disagree	strongly disagree	strongly disagree	strongly disagree	strongly disagree	disagree	disagree	strongly disagree	Basically at a standstill	laboratory facilities are closed or equipments are unavailable┋some researchers(including students) cannot attend┋academic communications between co-workers have been blocked┋difficult to obtain (experimental materials/samples) on time	feeling stress and worry	yes	yes	yes	yes	yes	yes	yes	yes
119	2020/3/4 0:38:15	233s	female	25-39	985、211 universities	none	PhD candidate(graduate year)	(pass)	(pass)	non-Hubei provinces	yes	Life-science	basic medicine	(pass)	disagree	disagree	disagree	neutral	disagree	disagree	disagree	disagree	disagree	disagree	disagree	strongly disagree	neutral	agree	disagree	strongly disagree	disagree	disagree	neutral	disagree	disagree	strongly disagree	agree	strongly disagree	Basically at a standstill	laboratory facilities are closed or equipments are unavailable┋some researchers(including students) cannot attend┋academic communications between co-workers have been blocked┋difficult to obtain (experimental materials/samples) on time	few influences to my emotion	yes	no	no	no	no	yes	no	yes
120	2020/3/4 0:46:44	330s	female	18-24	985、211 universities	none	PhD candidate(non-graduate year)	(pass)	(pass)	non-Hubei provinces	yes	Life-science	basic medicine	(pass)	agree	neutral	strongly agree	strongly agree	agree	strongly agree	strongly agree	strongly agree	strongly agree	strongly agree	agree	strongly agree	strongly agree	strongly disagree	disagree	agree	agree	neutral	agree	agree	disagree	disagree	disagree	disagree	Basically at a standstill	laboratory facilities are closed or equipments are unavailable┋some researchers(including students) cannot attend┋academic communications between co-workers have been blocked┋difficult to obtain (experimental materials/samples) on time┋others〖在家none心科研〗	feeling about to collapse	yes	no	yes	yes	no	yes	no	no
121	2020/3/4 0:48:15	220s	female	25-39	university affiliated hospital	lecturer(assistant researcher, attending physician)	clinical medical staff(including postdoctoral)	(pass)	(pass)	non-Hubei provinces	no	Life-science	basic medicine	(pass)	disagree	neutral	neutral	agree	disagree	disagree	neutral	disagree	neutral	neutral	neutral	disagree	agree	disagree	disagree	strongly disagree	neutral	agree	strongly agree	disagree	agree	disagree	neutral	strongly disagree	completely unaffected	(pass)	(pass)	yes	no	no	no	no	no	no	no
122	2020/3/4 0:49:24	185s	male	18-24	985、211 universities	none	PhD candidate(non-graduate year)	(pass)	(pass)	non-Hubei provinces	yes	Life-science	clinical medicine	(pass)	strongly agree	strongly agree	strongly agree	strongly agree	strongly agree	strongly agree	strongly agree	strongly agree	strongly agree	strongly agree	strongly agree	strongly agree	strongly agree	disagree	strongly disagree	strongly disagree	strongly disagree	neutral	neutral	disagree	agree	strongly disagree	agree	strongly disagree	Basically at a standstill	some researchers(including students) cannot attend┋difficult to obtain (experimental materials/samples) on time	feeling stress and worry	yes	no	yes	no	yes	yes	yes	no
123	2020/3/4 0:57:19	178s	female	25-39	985、211 universities	lecturer(assistant researcher, attending physician)	clinical medical staff(including postdoctoral)	(pass)	(pass)	non-Hubei provinces	no	Life-science	basic medicine	(pass)	neutral	neutral	neutral	agree	neutral	neutral	neutral	agree	neutral	neutral	agree	neutral	neutral	agree	agree	disagree	neutral	disagree	disagree	disagree	disagree	neutral	neutral	strongly disagree	still under way but at a slower pace than before	academic communications between co-workers have been blocked	feeling stress and worry	yes	yes	no	no	no	yes	no	yes
124	2020/3/4 1:04:55	129s	male	25-39	university affiliated hospital	lecturer(assistant researcher, attending physician)	clinical medical staff(including postdoctoral)	(pass)	(pass)	non-Hubei provinces	yes	Life-science	basic medicine	(pass)	strongly disagree	disagree	strongly disagree	neutral	strongly disagree	disagree	disagree	strongly disagree	strongly disagree	strongly disagree	strongly disagree	strongly disagree	strongly disagree	strongly disagree	strongly disagree	disagree	strongly disagree	strongly disagree	disagree	strongly disagree	strongly disagree	strongly disagree	neutral	strongly disagree	Basically at a standstill	academic communications between co-workers have been blocked	feeling stress and worry	yes	no	no	no	no	yes	no	yes
125	2020/3/4 1:11:57	167s	female	25-39	985、211 universities	none	clinical medical staff(including postdoctoral)	(pass)	(pass)	non-Hubei provinces	no	Life-science	clinical medicine	(pass)	disagree	disagree	disagree	disagree	strongly disagree	disagree	strongly disagree	strongly disagree	disagree	disagree	disagree	disagree	disagree	disagree	strongly disagree	agree	neutral	strongly disagree	neutral	strongly disagree	disagree	strongly disagree	disagree	strongly disagree	completely unaffected	(pass)	(pass)	no	no	no	no	no	no	no	no
126	2020/3/4 1:21:10	105s	female	25-39	university affiliated hospital	none	clinical medical staff(including postdoctoral)	(pass)	(pass)	non-Hubei provinces	no	non-life science（engineering, natural science, etc.）	(pass)	fundamental research/theoretical research	strongly disagree	strongly disagree	strongly disagree	strongly disagree	strongly disagree	strongly disagree	strongly disagree	strongly disagree	strongly disagree	strongly disagree	strongly disagree	strongly disagree	strongly disagree	strongly disagree	strongly disagree	strongly disagree	strongly disagree	strongly disagree	strongly disagree	strongly disagree	strongly disagree	strongly disagree	strongly disagree	strongly disagree	Basically at a standstill	laboratory facilities are closed or equipments are unavailable┋some researchers(including students) cannot attend┋academic communications between co-workers have been blocked┋difficult to obtain (experimental materials/samples) on time	feeling stress and worry	yes	yes	yes	yes	yes	yes	yes	yes
127	2020/3/4 1:49:28	181s	male	25-39	985、211 universities	lecturer(assistant researcher, attending physician)	clinical medical staff(including postdoctoral)	(pass)	(pass)	non-Hubei provinces	yes	Life-science	clinical medicine	(pass)	disagree	disagree	disagree	disagree	disagree	disagree	disagree	disagree	disagree	neutral	disagree	disagree	disagree	strongly disagree	disagree	disagree	disagree	disagree	neutral	agree	neutral	disagree	disagree	strongly disagree	Basically at a standstill	laboratory facilities are closed or equipments are unavailable┋some researchers(including students) cannot attend┋academic communications between co-workers have been blocked	feeling stress and worry	yes	yes	yes	yes	yes	yes	yes	yes
128	2020/3/4 2:21:08	326s	female	25-39	985、211 universities	none	PhD candidate(graduate year)	(pass)	(pass)	non-Hubei provinces	no	Life-science	clinical medicine	(pass)	disagree	disagree	neutral	neutral	disagree	neutral	neutral	neutral	neutral	neutral	disagree	strongly disagree	neutral	strongly disagree	agree	disagree	disagree	strongly disagree	agree	strongly disagree	disagree	strongly disagree	neutral	strongly disagree	still under way but at a slower pace than before	laboratory facilities are closed or equipments are unavailable┋difficult to obtain (experimental materials/samples) on time	feeling stress and worry	yes	no	no	yes	no	yes	yes	yes
129	2020/3/4 2:25:49	138s	female	25-39	985、211 universities	none	clinical medical staff(including postdoctoral)	(pass)	(pass)	non-Hubei provinces	no	Life-science	clinical medicine	(pass)	strongly disagree	disagree	disagree	agree	disagree	strongly disagree	disagree	strongly disagree	disagree	disagree	disagree	strongly disagree	disagree	disagree	disagree	strongly disagree	disagree	strongly disagree	disagree	strongly disagree	disagree	disagree	disagree	strongly disagree	Basically at a standstill	laboratory facilities are closed or equipments are unavailable	feeling stress and worry	yes	yes	yes	yes	yes	yes	yes	yes
130	2020/3/4 7:45:30	181s	male	18-24	985、211 universities	none	master candidate(non-graduate year)	inadequate preparation	no	non-Hubei provinces	no	Life-science	clinical medicine	(pass)	strongly disagree	strongly disagree	strongly disagree	strongly disagree	strongly disagree	strongly disagree	strongly disagree	strongly disagree	strongly disagree	strongly disagree	strongly disagree	strongly disagree	strongly disagree	disagree	disagree	disagree	disagree	strongly disagree	disagree	disagree	disagree	strongly disagree	agree	strongly disagree	Basically at a standstill	laboratory facilities are closed or equipments are unavailable┋some researchers(including students) cannot attend┋difficult to obtain (experimental materials/samples) on time	feeling stress and worry	no	no	no	no	yes	yes	yes	yes
131	2020/3/4 7:49:44	227s	male	25-39	985、211 universities	lecturer(assistant researcher, attending physician)	clinical medical staff(including postdoctoral)	(pass)	(pass)	non-Hubei provinces	no	Life-science	basic medicine	(pass)	strongly disagree	strongly disagree	strongly disagree	disagree	strongly disagree	disagree	disagree	disagree	disagree	disagree	disagree	strongly disagree	strongly disagree	strongly disagree	strongly disagree	strongly disagree	strongly disagree	strongly disagree	disagree	disagree	disagree	disagree	neutral	strongly disagree	still under way but at a slower pace than before	laboratory facilities are closed or equipments are unavailable┋some researchers(including students) cannot attend┋academic communications between co-workers have been blocked┋difficult to obtain (experimental materials/samples) on time	few influences to my emotion	yes	yes	no	no	yes	yes	yes	yes
132	2020/3/4 7:52:25	365s	male	25-39	985、211 universities	associate professor(associate researcher, associate chief physician)	basic research staff(including postdoctoral)	(pass)	(pass)	non-Hubei provinces	yes	non-life science（engineering, natural science, etc.）	(pass)	applied research	strongly disagree	strongly disagree	disagree	disagree	strongly disagree	strongly disagree	strongly disagree	strongly disagree	neutral	neutral	disagree	neutral	neutral	agree	neutral	neutral	disagree	strongly disagree	agree	strongly disagree	neutral	disagree	neutral	strongly disagree	Basically at a standstill	laboratory facilities are closed or equipments are unavailable	feeling stress and worry	no	no	no	no	no	yes	no	yes
133	2020/3/4 8:07:36	299s	female	25-39	university affiliated hospital	lecturer(assistant researcher, attending physician)	clinical medical staff(including postdoctoral)	(pass)	(pass)	non-Hubei provinces	yes	Life-science	basic medicine	(pass)	disagree	strongly disagree	disagree	neutral	disagree	disagree	disagree	disagree	disagree	strongly disagree	disagree	neutral	strongly disagree	strongly disagree	strongly disagree	neutral	neutral	strongly disagree	disagree	disagree	disagree	strongly disagree	neutral	strongly disagree	Basically at a standstill	laboratory facilities are closed or equipments are unavailable┋some researchers(including students) cannot attend	feeling stress and worry	yes	yes	no	no	yes	yes	yes	no
134	2020/3/4 8:14:00	90s	female	25-39	985、211 universities	none	PhD candidate(non-graduate year)	(pass)	(pass)	non-Hubei provinces	no	Life-science	basic medicine	(pass)	strongly disagree	agree	strongly disagree	strongly disagree	strongly disagree	strongly disagree	strongly disagree	strongly disagree	strongly disagree	agree	agree	agree	strongly disagree	strongly disagree	strongly disagree	strongly disagree	strongly disagree	strongly disagree	strongly disagree	strongly disagree	strongly disagree	strongly disagree	strongly disagree	strongly disagree	completely unaffected	(pass)	(pass)	no	no	no	no	no	no	no	no
135	2020/3/4 8:26:04	204s	female	25-39	985、211 universities	none	PhD candidate(graduate year)	(pass)	(pass)	non-Hubei provinces	no	Life-science	clinical medicine	(pass)	neutral	disagree	neutral	strongly agree	disagree	strongly agree	agree	agree	agree	agree	agree	strongly disagree	neutral	disagree	strongly disagree	strongly disagree	neutral	agree	neutral	neutral	disagree	disagree	disagree	strongly disagree	Basically at a standstill	laboratory facilities are closed or equipments are unavailable	feeling about to collapse	yes	yes	yes	yes	yes	yes	yes	yes
136	2020/3/4 8:44:57	157s	male	25-39	university affiliated hospital	associate professor(associate researcher, associate chief physician)	clinical medical staff(including postdoctoral)	(pass)	(pass)	non-Hubei provinces	yes	Life-science	basic medicine	(pass)	strongly disagree	strongly disagree	strongly disagree	strongly disagree	strongly disagree	strongly disagree	strongly disagree	strongly disagree	strongly disagree	strongly disagree	strongly disagree	strongly disagree	strongly disagree	strongly disagree	strongly disagree	strongly disagree	strongly disagree	strongly disagree	strongly disagree	strongly disagree	strongly disagree	strongly disagree	strongly disagree	strongly disagree	Basically at a standstill	laboratory facilities are closed or equipments are unavailable┋some researchers(including students) cannot attend	few influences to my emotion	no	no	no	no	no	no	no	yes
137	2020/3/4 8:56:51	154s	male	25-39	985、211 universities	none	PhD candidate(non-graduate year)	(pass)	(pass)	non-Hubei provinces	yes	Life-science	clinical medicine	(pass)	strongly disagree	disagree	disagree	agree	strongly disagree	disagree	strongly disagree	strongly disagree	disagree	neutral	disagree	neutral	disagree	neutral	disagree	strongly disagree	disagree	disagree	disagree	disagree	agree	disagree	neutral	strongly disagree	Basically at a standstill	laboratory facilities are closed or equipments are unavailable┋some researchers(including students) cannot attend┋academic communications between co-workers have been blocked┋difficult to obtain (experimental materials/samples) on time	few influences to my emotion	yes	yes	no	yes	yes	yes	yes	yes
138	2020/3/4 9:12:15	184s	female	18-24	985、211 universities	none	undergraduates	(pass)	(pass)	non-Hubei provinces	yes	Life-science	clinical medicine	(pass)	disagree	disagree	neutral	neutral	disagree	disagree	strongly disagree	disagree	disagree	disagree	disagree	disagree	disagree	agree	agree	neutral	disagree	disagree	disagree	strongly disagree	agree	strongly agree	strongly agree	strongly disagree	completely unaffected	(pass)	(pass)	no	yes	no	no	no	no	no	no
139	2020/3/4 9:27:53	168s	female	25-39	university affiliated hospital	none	PhD candidate(graduate year)	(pass)	(pass)	non-Hubei provinces	yes	Life-science	clinical medicine	(pass)	agree	neutral	neutral	strongly agree	agree	agree	agree	agree	agree	agree	strongly agree	agree	agree	strongly agree	strongly agree	strongly agree	strongly agree	agree	strongly agree	agree	strongly agree	strongly agree	strongly agree	strongly disagree	Basically at a standstill	laboratory facilities are closed or equipments are unavailable┋some researchers(including students) cannot attend	feeling stress and worry	yes	yes	yes	yes	yes	yes	yes	yes
140	2020/3/4 9:32:01	233s	female	25-39	university affiliated hospital	none	PhD candidate(graduate year)	(pass)	(pass)	non-Hubei provinces	yes	Life-science	clinical medicine	(pass)	strongly disagree	strongly disagree	strongly disagree	disagree	strongly disagree	strongly disagree	disagree	strongly disagree	disagree	strongly disagree	strongly disagree	strongly disagree	disagree	strongly disagree	disagree	strongly disagree	strongly disagree	strongly disagree	disagree	strongly disagree	strongly disagree	strongly disagree	neutral	strongly disagree	still under way but at a slower pace than before	some researchers(including students) cannot attend┋academic communications between co-workers have been blocked	feeling stress and worry	no	no	no	no	no	yes	yes	yes
141	2020/3/4 9:32:49	202s	female	25-39	985、211 universities	none	master candidate(non-graduate year)	inadequate preparation	yes	non-Hubei provinces	yes	Life-science	public health	(pass)	strongly disagree	disagree	disagree	neutral	strongly disagree	disagree	strongly disagree	strongly disagree	neutral	disagree	disagree	disagree	disagree	agree	strongly disagree	strongly disagree	disagree	strongly disagree	disagree	strongly disagree	strongly disagree	strongly disagree	disagree	strongly disagree	still under way but at a slower pace than before	academic communications between co-workers have been blocked	few influences to my emotion	yes	no	no	no	no	no	no	no
142	2020/3/4 9:39:49	840s	male	25-39	university affiliated hospital	lecturer(assistant researcher, attending physician)	PhD candidate(graduate year)	(pass)	(pass)	non-Hubei provinces	yes	the humanities and social sciences	(pass)	applied research	strongly disagree	disagree	disagree	disagree	strongly disagree	strongly disagree	disagree	disagree	disagree	disagree	disagree	disagree	disagree	disagree	disagree	strongly disagree	neutral	disagree	disagree	disagree	disagree	disagree	neutral	strongly disagree	still under way but at a slower pace than before	others	feeling stress and worry	yes	yes	no	yes	no	yes	yes	yes
143	2020/3/4 9:41:47	178s	male	18-24	985、211 universities	none	master candidate(non-graduate year)	not yet	yes	non-Hubei provinces	no	Life-science	public health	(pass)	strongly disagree	strongly disagree	disagree	disagree	strongly disagree	disagree	neutral	disagree	disagree	disagree	disagree	neutral	neutral	neutral	disagree	strongly disagree	neutral	strongly disagree	disagree	disagree	disagree	strongly disagree	disagree	strongly agree	still under way but at a slower pace than before	academic communications between co-workers have been blocked	feeling stress and worry	yes	no	no	no	no	no	no	yes
144	2020/3/4 9:44:41	110s	male	25-39	985、211 universities	none	PhD candidate(non-graduate year)	(pass)	(pass)	non-Hubei provinces	no	non-life science（engineering, natural science, etc.）	(pass)	applied research	strongly disagree	strongly disagree	strongly disagree	strongly disagree	strongly disagree	strongly disagree	strongly disagree	strongly disagree	strongly disagree	strongly disagree	strongly disagree	strongly disagree	strongly disagree	strongly disagree	strongly disagree	strongly disagree	strongly disagree	strongly disagree	strongly disagree	strongly disagree	strongly disagree	strongly disagree	strongly disagree	strongly disagree	still under way but at a slower pace than before	laboratory facilities are closed or equipments are unavailable	few influences to my emotion	yes	yes	yes	yes	yes	yes	yes	yes
145	2020/3/4 9:52:09	139s	male	25-39	985、211 universities	none	PhD candidate(non-graduate year)	(pass)	(pass)	non-Hubei provinces	no	Life-science	public health	(pass)	strongly disagree	strongly disagree	disagree	disagree	strongly disagree	strongly disagree	strongly disagree	strongly disagree	disagree	strongly disagree	strongly disagree	strongly disagree	neutral	disagree	strongly disagree	strongly disagree	strongly disagree	strongly disagree	disagree	strongly disagree	strongly disagree	strongly disagree	strongly disagree	strongly disagree	Basically at a standstill	others〖查阅资料不方便〗	feeling stress and worry	no	yes	no	no	yes	yes	no	yes
146	2020/3/4 10:49:10	226s	male	25-39	985、211 universities	none	PhD candidate(graduate year)	(pass)	(pass)	non-Hubei provinces	no	Life-science	basic medicine	(pass)	strongly disagree	strongly disagree	strongly disagree	strongly disagree	strongly disagree	strongly disagree	strongly disagree	strongly disagree	strongly disagree	strongly disagree	strongly disagree	strongly disagree	strongly disagree	strongly disagree	disagree	strongly disagree	strongly disagree	strongly disagree	strongly disagree	strongly disagree	strongly disagree	disagree	disagree	strongly disagree	Basically at a standstill	laboratory facilities are closed or equipments are unavailable┋some researchers(including students) cannot attend┋difficult to obtain (experimental materials/samples) on time	few influences to my emotion	no	no	no	no	no	no	no	no
147	2020/3/4 11:12:13	297s	female	25-39	university affiliated hospital	none	PhD candidate(non-graduate year)	(pass)	(pass)	non-Hubei provinces	no	the humanities and social sciences	(pass)	applied research	strongly disagree	strongly disagree	neutral	neutral	neutral	neutral	neutral	disagree	neutral	neutral	disagree	disagree	disagree	disagree	disagree	disagree	disagree	disagree	disagree	disagree	disagree	disagree	disagree	strongly disagree	completely unaffected	(pass)	(pass)	no	no	no	no	no	no	no	no
148	2020/3/4 11:15:10	227s	female	25-39	985、211 universities	lecturer(assistant researcher, attending physician)	clinical medical staff(including postdoctoral)	(pass)	(pass)	non-Hubei provinces	no	others〖clinical medicine〗	(pass)	others	strongly disagree	strongly disagree	disagree	disagree	strongly disagree	strongly disagree	strongly disagree	strongly disagree	disagree	strongly disagree	strongly disagree	strongly disagree	strongly disagree	disagree	strongly disagree	disagree	disagree	strongly disagree	strongly disagree	strongly disagree	strongly disagree	strongly disagree	strongly disagree	strongly disagree	Basically at a standstill	laboratory facilities are closed or equipments are unavailable┋some researchers(including students) cannot attend┋difficult to obtain (experimental materials/samples) on time	feeling stress and worry	yes	yes	yes	no	yes	yes	yes	yes
149	2020/3/4 11:34:51	216s	female	25-39	university affiliated hospital	lecturer(assistant researcher, attending physician)	clinical medical staff(including postdoctoral)	(pass)	(pass)	non-Hubei provinces	yes	Life-science	clinical medicine	(pass)	neutral	disagree	neutral	neutral	neutral	neutral	disagree	agree	agree	neutral	agree	agree	agree	strongly agree	strongly agree	disagree	strongly agree	neutral	agree	neutral	neutral	neutral	agree	strongly disagree	Basically at a standstill	laboratory facilities are closed or equipments are unavailable┋some researchers(including students) cannot attend┋difficult to obtain (experimental materials/samples) on time	feeling stress and worry	yes	yes	yes	no	yes	yes	no	yes
150	2020/3/4 11:39:17	134s	female	25-39	university affiliated hospital	lecturer(assistant researcher, attending physician)	clinical medical staff(including postdoctoral)	(pass)	(pass)	non-Hubei provinces	no	Life-science	clinical medicine	(pass)	strongly disagree	strongly disagree	strongly disagree	strongly disagree	strongly disagree	strongly disagree	strongly disagree	strongly disagree	strongly disagree	strongly disagree	strongly disagree	strongly disagree	strongly disagree	strongly disagree	strongly disagree	strongly disagree	strongly disagree	strongly disagree	strongly disagree	strongly disagree	strongly disagree	strongly disagree	strongly disagree	strongly disagree	Basically at a standstill	laboratory facilities are closed or equipments are unavailable┋some researchers(including students) cannot attend┋academic communications between co-workers have been blocked┋difficult to obtain (experimental materials/samples) on time	few influences to my emotion	no	no	no	yes	yes	yes	yes	no
151	2020/3/4 11:39:24	220s	male	25-39	university affiliated hospital	lecturer(assistant researcher, attending physician)	basic research staff(including postdoctoral)	(pass)	(pass)	non-Hubei provinces	yes	Life-science	basic medicine	(pass)	strongly disagree	disagree	strongly disagree	strongly disagree	strongly disagree	strongly disagree	strongly disagree	strongly disagree	strongly disagree	disagree	disagree	disagree	strongly disagree	strongly disagree	strongly disagree	strongly disagree	strongly disagree	strongly disagree	strongly disagree	strongly disagree	strongly disagree	strongly disagree	strongly disagree	strongly disagree	Basically at a standstill	some researchers(including students) cannot attend┋academic communications between co-workers have been blocked	few influences to my emotion	no	no	no	no	no	yes	no	yes
152	2020/3/4 11:39:58	266s	female	25-39	university affiliated hospital	lecturer(assistant researcher, attending physician)	clinical medical staff(including postdoctoral)	(pass)	(pass)	non-Hubei provinces	no	the humanities and social sciences	(pass)	fundamental research/theoretical research	neutral	neutral	disagree	disagree	neutral	agree	neutral	disagree	strongly disagree	strongly disagree	strongly disagree	strongly disagree	strongly disagree	strongly disagree	strongly disagree	strongly disagree	strongly disagree	strongly disagree	strongly disagree	strongly disagree	strongly disagree	strongly disagree	strongly disagree	strongly disagree	still under way but at a slower pace than before	some researchers(including students) cannot attend	few influences to my emotion	no	no	no	no	no	no	no	no
153	2020/3/4 11:40:44	207s	female	25-39	university affiliated hospital	associate professor(associate researcher, associate chief physician)	basic research staff(including postdoctoral)	(pass)	(pass)	non-Hubei provinces	yes	Life-science	basic medicine	(pass)	strongly disagree	strongly disagree	disagree	disagree	strongly disagree	strongly disagree	strongly disagree	disagree	strongly disagree	strongly disagree	strongly disagree	disagree	disagree	disagree	disagree	strongly disagree	strongly disagree	strongly disagree	disagree	disagree	strongly disagree	strongly disagree	strongly disagree	disagree	Basically at a standstill	laboratory facilities are closed or equipments are unavailable┋some researchers(including students) cannot attend	feeling stress and worry	yes	yes	no	yes	no	yes	no	yes
154	2020/3/4 11:44:26	197s	female	25-39	985、211 universities	lecturer(assistant researcher, attending physician)	clinical medical staff(including postdoctoral)	(pass)	(pass)	non-Hubei provinces	yes	Life-science	basic medicine	(pass)	strongly disagree	strongly disagree	disagree	disagree	strongly disagree	strongly disagree	strongly disagree	strongly disagree	strongly disagree	strongly disagree	strongly disagree	strongly disagree	strongly disagree	strongly disagree	strongly disagree	strongly disagree	strongly disagree	strongly disagree	strongly disagree	strongly disagree	strongly disagree	strongly disagree	strongly disagree	strongly disagree	Basically at a standstill	laboratory facilities are closed or equipments are unavailable┋some researchers(including students) cannot attend┋difficult to obtain (experimental materials/samples) on time	feeling stress and worry	yes	yes	yes	yes	no	yes	no	yes
155	2020/3/4 11:44:44	360s	female	25-39	university affiliated hospital	none	clinical medical staff(including postdoctoral)	(pass)	(pass)	non-Hubei provinces	yes	Life-science	clinical medicine	(pass)	disagree	neutral	neutral	neutral	strongly disagree	disagree	neutral	disagree	disagree	disagree	neutral	neutral	neutral	disagree	disagree	strongly disagree	disagree	strongly disagree	disagree	strongly disagree	strongly disagree	strongly disagree	disagree	strongly disagree	still under way but at a slower pace than before	some researchers(including students) cannot attend	feeling stress and worry	yes	no	no	no	no	yes	no	no
156	2020/3/4 11:45:20	186s	male	25-39	university affiliated hospital	lecturer(assistant researcher, attending physician)	clinical medical staff(including postdoctoral)	(pass)	(pass)	non-Hubei provinces	yes	Life-science	clinical medicine	(pass)	disagree	neutral	disagree	neutral	neutral	strongly disagree	neutral	neutral	neutral	disagree	neutral	neutral	neutral	neutral	disagree	disagree	disagree	disagree	disagree	disagree	disagree	disagree	neutral	strongly disagree	completely unaffected	(pass)	(pass)	yes	no	yes	no	yes	yes	yes	yes
157	2020/3/4 11:46:29	280s	female	18-24	985、211 universities	none	master candidate(non-graduate year)	inadequate preparation	yes	non-Hubei provinces	yes	Life-science	basic medicine	(pass)	strongly disagree	strongly disagree	disagree	neutral	strongly disagree	neutral	disagree	disagree	disagree	agree	strongly agree	agree	agree	strongly agree	strongly disagree	disagree	agree	strongly disagree	agree	disagree	strongly disagree	disagree	strongly agree	strongly disagree	Basically at a standstill	laboratory facilities are closed or equipments are unavailable┋difficult to obtain (experimental materials/samples) on time	feeling stress and worry	yes	no	no	yes	yes	yes	yes	yes
158	2020/3/4 11:47:39	197s	male	25-39	985、211 universities	associate professor(associate researcher, associate chief physician)	clinical medical staff(including postdoctoral)	(pass)	(pass)	non-Hubei provinces	yes	Life-science	clinical medicine	(pass)	strongly disagree	disagree	strongly disagree	neutral	strongly disagree	disagree	disagree	disagree	disagree	disagree	disagree	disagree	disagree	neutral	neutral	disagree	disagree	strongly disagree	disagree	neutral	strongly disagree	neutral	neutral	strongly disagree	still under way but at a slower pace than before	laboratory facilities are closed or equipments are unavailable	few influences to my emotion	yes	no	no	no	yes	yes	yes	yes
159	2020/3/4 11:48:40	191s	female	25-39	university affiliated hospital	none	basic research staff(including postdoctoral)	(pass)	(pass)	non-Hubei provinces	yes	Life-science	basic medicine	(pass)	disagree	disagree	disagree	disagree	disagree	disagree	disagree	disagree	disagree	disagree	disagree	disagree	disagree	disagree	disagree	disagree	disagree	disagree	disagree	disagree	disagree	strongly disagree	agree	strongly disagree	still under way but at a slower pace than before	laboratory facilities are closed or equipments are unavailable	few influences to my emotion	no	no	no	no	no	no	no	no
160	2020/3/4 11:48:43	198s	male	40-59	985、211 universities	associate professor(associate researcher, associate chief physician)	clinical medical staff(including postdoctoral)	(pass)	(pass)	non-Hubei provinces	no	Life-science	clinical medicine	(pass)	strongly disagree	strongly agree	strongly agree	strongly agree	disagree	disagree	disagree	neutral	neutral	neutral	disagree	disagree	disagree	strongly agree	strongly agree	neutral	disagree	strongly agree	neutral	strongly agree	disagree	disagree	disagree	strongly agree	Basically at a standstill	laboratory facilities are closed or equipments are unavailable┋some researchers(including students) cannot attend┋academic communications between co-workers have been blocked┋difficult to obtain (experimental materials/samples) on time	feeling stress and worry	yes	yes	yes	yes	yes	yes	yes	yes
161	2020/3/4 11:52:48	220s	male	25-39	university affiliated hospital	lecturer(assistant researcher, attending physician)	clinical medical staff(including postdoctoral)	(pass)	(pass)	non-Hubei provinces	yes	Life-science	basic medicine	(pass)	strongly disagree	disagree	disagree	disagree	strongly disagree	disagree	strongly disagree	strongly disagree	disagree	strongly disagree	strongly disagree	strongly disagree	strongly disagree	disagree	disagree	disagree	disagree	strongly disagree	strongly disagree	strongly disagree	strongly disagree	strongly disagree	neutral	strongly disagree	Basically at a standstill	laboratory facilities are closed or equipments are unavailable┋some researchers(including students) cannot attend┋difficult to obtain (experimental materials/samples) on time	few influences to my emotion	no	no	no	no	no	yes	no	yes
162	2020/3/4 11:54:28	205s	female	18-24	985、211 universities	none	master candidate(non-graduate year)	inadequate preparation	yes	non-Hubei provinces	yes	Life-science	basic medicine	(pass)	strongly disagree	agree	disagree	neutral	disagree	strongly disagree	strongly disagree	disagree	disagree	strongly disagree	strongly disagree	neutral	strongly disagree	strongly agree	strongly disagree	strongly disagree	agree	strongly disagree	strongly disagree	strongly disagree	strongly disagree	strongly disagree	disagree	strongly disagree	completely unaffected	(pass)	(pass)	no	no	no	no	no	yes	yes	no
163	2020/3/4 12:07:47	186s	female	25-39	university affiliated hospital	none	master candidate(non-graduate year)	inadequate preparation	yes	non-Hubei provinces	yes	Life-science	clinical medicine	(pass)	strongly disagree	strongly disagree	strongly disagree	strongly disagree	strongly disagree	strongly disagree	strongly disagree	strongly disagree	strongly disagree	strongly disagree	strongly disagree	strongly disagree	strongly disagree	strongly disagree	strongly disagree	disagree	strongly disagree	strongly disagree	disagree	strongly disagree	strongly disagree	strongly disagree	strongly disagree	strongly disagree	still under way but at a slower pace than before	some researchers(including students) cannot attend	feeling stress and worry	no	no	no	no	no	yes	no	no
164	2020/3/4 12:08:27	242s	female	18-24	university affiliated hospital	none	master candidate(non-graduate year)	inadequate preparation	no	non-Hubei provinces	no	Life-science	clinical medicine	(pass)	strongly disagree	strongly disagree	strongly disagree	strongly disagree	strongly disagree	strongly disagree	strongly disagree	strongly disagree	strongly disagree	strongly disagree	strongly disagree	strongly disagree	strongly disagree	strongly disagree	strongly disagree	strongly disagree	strongly disagree	strongly disagree	strongly disagree	strongly disagree	strongly disagree	strongly disagree	strongly disagree	strongly disagree	completely unaffected	(pass)	(pass)	no	no	no	no	no	no	no	yes
165	2020/3/4 12:09:10	114s	female	18-24	985、211 universities	none	undergraduates	(pass)	(pass)	non-Hubei provinces	yes	Life-science	basic medicine	(pass)	strongly disagree	strongly disagree	disagree	strongly disagree	strongly disagree	strongly disagree	strongly disagree	strongly disagree	strongly disagree	disagree	disagree	disagree	disagree	disagree	strongly disagree	disagree	disagree	strongly disagree	disagree	strongly disagree	strongly disagree	disagree	disagree	strongly disagree	completely unaffected	(pass)	(pass)	yes	yes	yes	yes	yes	yes	yes	yes
166	2020/3/4 12:11:30	184s	male	25-39	985、211 universities	none	PhD candidate(non-graduate year)	(pass)	(pass)	non-Hubei provinces	yes	Life-science	basic medicine	(pass)	disagree	disagree	disagree	neutral	strongly disagree	neutral	disagree	disagree	neutral	disagree	disagree	disagree	disagree	neutral	agree	agree	disagree	disagree	neutral	disagree	disagree	disagree	disagree	strongly disagree	still under way but at a slower pace than before	laboratory facilities are closed or equipments are unavailable┋some researchers(including students) cannot attend┋difficult to obtain (experimental materials/samples) on time	feeling stress and worry	yes	yes	no	no	yes	yes	yes	yes
167	2020/3/4 12:13:12	54s	male	25-39	985、211 universities	lecturer(assistant researcher, attending physician)	basic research staff(including postdoctoral)	(pass)	(pass)	non-Hubei provinces	no	Life-science	basic medicine	(pass)	disagree	disagree	disagree	disagree	neutral	neutral	disagree	disagree	disagree	neutral	neutral	neutral	disagree	disagree	neutral	disagree	disagree	disagree	neutral	disagree	disagree	disagree	neutral	neutral	Basically at a standstill	laboratory facilities are closed or equipments are unavailable┋some researchers(including students) cannot attend┋academic communications between co-workers have been blocked┋difficult to obtain (experimental materials/samples) on time	feeling stress and worry	yes	yes	no	no	no	no	yes	yes
168	2020/3/4 12:17:33	313s	female	25-39	university affiliated hospital	none	undergraduates	(pass)	(pass)	non-Hubei provinces	no	Life-science	clinical medicine	(pass)	strongly disagree	strongly disagree	strongly disagree	strongly disagree	strongly disagree	strongly disagree	disagree	disagree	disagree	disagree	disagree	neutral	disagree	agree	disagree	strongly disagree	disagree	disagree	disagree	disagree	strongly disagree	strongly disagree	disagree	strongly disagree	completely unaffected	(pass)	(pass)	no	no	no	no	no	no	no	no
169	2020/3/4 12:18:37	321s	male	25-39	university affiliated hospital	none	master candidate(graduate year)	inadequate preparation	no	non-Hubei provinces	no	Life-science	clinical medicine	(pass)	strongly disagree	strongly disagree	strongly disagree	strongly disagree	strongly disagree	strongly disagree	strongly disagree	strongly disagree	strongly disagree	strongly disagree	strongly disagree	strongly disagree	strongly disagree	strongly disagree	strongly disagree	strongly disagree	strongly disagree	strongly disagree	strongly disagree	strongly disagree	strongly disagree	neutral	neutral	strongly disagree	Basically at a standstill	laboratory facilities are closed or equipments are unavailable┋some researchers(including students) cannot attend┋difficult to obtain (experimental materials/samples) on time	feeling about to collapse	yes	yes	yes	yes	no	yes	yes	yes
170	2020/3/4 12:32:55	245s	male	25-39	independent research institutes (including research institutes)	none	master candidate(non-graduate year)	inadequate preparation	yes	non-Hubei provinces	no	Life-science	clinical medicine	(pass)	disagree	strongly agree	strongly agree	strongly agree	agree	strongly agree	agree	strongly agree	agree	agree	neutral	strongly agree	strongly agree	disagree	strongly agree	neutral	agree	disagree	neutral	neutral	neutral	strongly disagree	disagree	neutral	completely unaffected	(pass)	(pass)	no	no	no	no	no	yes	no	yes
171	2020/3/4 12:34:45	334s	male	25-39	985、211 universities	none	master candidate(non-graduate year)	not yet	yes	non-Hubei provinces	no	Life-science	basic medicine	(pass)	strongly disagree	strongly disagree	disagree	disagree	strongly disagree	neutral	strongly disagree	neutral	neutral	disagree	disagree	strongly disagree	disagree	strongly disagree	strongly disagree	strongly disagree	disagree	disagree	disagree	disagree	disagree	disagree	agree	strongly disagree	Basically at a standstill	laboratory facilities are closed or equipments are unavailable┋some researchers(including students) cannot attend	feeling stress and worry	yes	yes	yes	yes	yes	yes	no	yes
172	2020/3/4 12:57:35	178s	male	18-24	985、211 universities	none	PhD candidate(non-graduate year)	(pass)	(pass)	non-Hubei provinces	yes	non-life science（engineering, natural science, etc.）	(pass)	applied research	strongly disagree	strongly disagree	disagree	neutral	strongly disagree	strongly disagree	strongly disagree	strongly disagree	disagree	strongly disagree	strongly disagree	strongly disagree	strongly disagree	neutral	strongly disagree	disagree	strongly disagree	strongly disagree	strongly disagree	strongly disagree	strongly disagree	neutral	strongly disagree	strongly disagree	Basically at a standstill	laboratory facilities are closed or equipments are unavailable┋academic communications between co-workers have been blocked┋others〖未携带相关资料回家〗	feeling stress and worry	no	yes	no	no	no	yes	no	yes
173	2020/3/4 12:58:39	907s	female	25-39	university affiliated hospital	none	clinical medical staff(including postdoctoral)	(pass)	(pass)	non-Hubei provinces	no	others	(pass)	others	neutral	disagree	strongly disagree	neutral	strongly disagree	strongly disagree	strongly disagree	neutral	strongly disagree	strongly disagree	strongly disagree	disagree	strongly disagree	agree	agree	disagree	strongly disagree	disagree	neutral	disagree	neutral	neutral	neutral	strongly disagree	completely unaffected	(pass)	(pass)	yes	no	no	yes	no	yes	no	yes
174	2020/3/4 13:01:49	154s	female	18-24	985、211 universities	none	master candidate(non-graduate year)	not yet	yes	non-Hubei provinces	no	Life-science	clinical medicine	(pass)	strongly disagree	neutral	disagree	disagree	strongly disagree	strongly disagree	strongly disagree	strongly disagree	strongly disagree	neutral	strongly disagree	strongly disagree	strongly disagree	strongly disagree	strongly disagree	strongly disagree	strongly disagree	strongly disagree	disagree	strongly disagree	neutral	strongly disagree	strongly agree	strongly disagree	Basically at a standstill	laboratory facilities are closed or equipments are unavailable┋some researchers(including students) cannot attend	few influences to my emotion	yes	yes	yes	yes	no	no	yes	no
175	2020/3/4 13:02:52	245s	female	18-24	985、211 universities	none	master candidate(non-graduate year)	not yet	yes	non-Hubei provinces	no	Life-science	others〖护理学〗	(pass)	strongly disagree	disagree	disagree	neutral	strongly disagree	disagree	strongly disagree	strongly disagree	strongly disagree	neutral	strongly disagree	strongly agree	agree	strongly disagree	strongly disagree	strongly disagree	disagree	disagree	neutral	disagree	disagree	disagree	disagree	strongly disagree	Basically at a standstill	others〖缺乏动力〗	feeling stress and worry	no	no	no	yes	no	yes	no	yes
176	2020/3/4 13:07:27	213s	female	25-39	university affiliated hospital	associate professor(associate researcher, associate chief physician)	clinical medical staff(including postdoctoral)	(pass)	(pass)	non-Hubei provinces	no	Life-science	clinical medicine	(pass)	strongly disagree	strongly disagree	disagree	disagree	disagree	strongly disagree	strongly disagree	strongly disagree	strongly disagree	strongly disagree	strongly disagree	disagree	disagree	disagree	strongly disagree	strongly disagree	strongly disagree	strongly disagree	disagree	strongly disagree	strongly disagree	strongly disagree	strongly disagree	strongly disagree	Basically at a standstill	some researchers(including students) cannot attend	feeling stress and worry	yes	yes	no	no	no	no	no	yes
177	2020/3/4 13:09:55	176s	female	18-24	985、211 universities	none	undergraduates	(pass)	(pass)	non-Hubei provinces	yes	Life-science	basic medicine	(pass)	strongly disagree	strongly disagree	strongly disagree	agree	strongly disagree	strongly disagree	disagree	strongly disagree	strongly disagree	strongly disagree	strongly disagree	strongly disagree	strongly disagree	strongly disagree	strongly disagree	strongly disagree	strongly disagree	disagree	strongly disagree	disagree	strongly disagree	strongly disagree	strongly disagree	strongly disagree	Basically at a standstill	some researchers(including students) cannot attend┋academic communications between co-workers have been blocked	few influences to my emotion	yes	no	no	no	no	no	no	yes
178	2020/3/4 13:16:08	123s	female	25-39	university affiliated hospital	none	clinical medical staff(including postdoctoral)	(pass)	(pass)	non-Hubei provinces	yes	Life-science	public health	(pass)	strongly disagree	strongly disagree	strongly disagree	strongly disagree	strongly disagree	strongly disagree	strongly disagree	strongly disagree	strongly disagree	strongly disagree	strongly disagree	strongly disagree	strongly disagree	strongly disagree	strongly disagree	strongly disagree	strongly disagree	strongly disagree	strongly disagree	strongly disagree	strongly disagree	strongly disagree	strongly disagree	strongly disagree	still under way but at a slower pace than before	others	few influences to my emotion	no	no	no	no	no	no	no	no
179	2020/3/4 13:20:03	114s	male	18-24	985、211 universities	none	undergraduates	(pass)	(pass)	non-Wuhan districts in Hubei provinces	yes	Life-science	basic medicine	(pass)	strongly disagree	strongly disagree	disagree	disagree	strongly disagree	strongly disagree	strongly disagree	strongly disagree	disagree	strongly disagree	neutral	strongly disagree	neutral	disagree	strongly disagree	disagree	strongly disagree	strongly disagree	strongly disagree	disagree	strongly disagree	disagree	neutral	strongly disagree	Basically at a standstill	laboratory facilities are closed or equipments are unavailable┋some researchers(including students) cannot attend	feeling stress and worry	yes	yes	yes	yes	yes	yes	yes	no
180	2020/3/4 13:25:03	166s	male	18-24	985、211 universities	none	undergraduates	(pass)	(pass)	non-Hubei provinces	no	Life-science	basic medicine	(pass)	strongly disagree	strongly disagree	strongly disagree	strongly disagree	strongly disagree	strongly disagree	strongly disagree	strongly disagree	strongly disagree	strongly disagree	strongly disagree	strongly disagree	strongly disagree	strongly disagree	strongly disagree	strongly disagree	strongly disagree	strongly disagree	strongly disagree	strongly disagree	strongly disagree	strongly disagree	strongly disagree	strongly disagree	still under way but at a slower pace than before	laboratory facilities are closed or equipments are unavailable┋some researchers(including students) cannot attend┋difficult to obtain (experimental materials/samples) on time	few influences to my emotion	yes	no	no	no	no	yes	no	yes
181	2020/3/4 13:43:50	301s	female	25-39	985、211 universities	none	PhD candidate(non-graduate year)	(pass)	(pass)	non-Hubei provinces	yes	non-life science（engineering, natural science, etc.）	(pass)	applied research	disagree	neutral	disagree	neutral	disagree	disagree	disagree	neutral	neutral	neutral	disagree	neutral	disagree	strongly disagree	strongly disagree	strongly disagree	disagree	strongly disagree	neutral	strongly disagree	disagree	strongly disagree	disagree	strongly disagree	completely unaffected	(pass)	(pass)	no	no	no	no	no	no	no	no
182	2020/3/4 14:22:43	225s	female	25-39	985、211 universities	lecturer(assistant researcher, attending physician)	clinical medical staff(including postdoctoral)	(pass)	(pass)	non-Hubei provinces	yes	Life-science	clinical medicine	(pass)	strongly disagree	strongly disagree	strongly disagree	disagree	strongly disagree	strongly disagree	strongly disagree	strongly disagree	strongly disagree	strongly disagree	strongly disagree	strongly agree	strongly disagree	strongly disagree	strongly disagree	strongly disagree	strongly disagree	strongly disagree	strongly disagree	strongly disagree	strongly disagree	strongly disagree	agree	strongly disagree	Basically at a standstill	laboratory facilities are closed or equipments are unavailable┋some researchers(including students) cannot attend┋difficult to obtain (experimental materials/samples) on time	feeling stress and worry	yes	yes	yes	yes	yes	no	no	yes
183	2020/3/4 14:38:14	136s	female	18-24	985、211 universities	none	undergraduates	(pass)	(pass)	non-Hubei provinces	no	Life-science	clinical medicine	(pass)	disagree	disagree	neutral	neutral	disagree	strongly disagree	disagree	disagree	disagree	strongly disagree	neutral	disagree	neutral	neutral	neutral	neutral	neutral	strongly disagree	disagree	disagree	strongly disagree	strongly disagree	disagree	strongly disagree	completely unaffected	(pass)	(pass)	no	no	no	no	no	no	no	yes
184	2020/3/4 14:40:23	287s	male	25-39	985、211 universities	none	master candidate(non-graduate year)	not yet	yes	non-Hubei provinces	no	non-life science（engineering, natural science, etc.）	(pass)	others	disagree	neutral	agree	strongly disagree	strongly disagree	disagree	strongly disagree	strongly disagree	strongly disagree	strongly disagree	disagree	strongly disagree	neutral	strongly disagree	strongly disagree	strongly disagree	disagree	strongly disagree	disagree	strongly disagree	strongly disagree	strongly disagree	neutral	strongly disagree	Basically at a standstill	others〖心理原因，变懒了〗	feeling stress and worry	no	no	no	no	no	no	no	yes
185	2020/3/4 14:54:38	216s	female	40-59	university affiliated hospital	associate professor(associate researcher, associate chief physician)	clinical medical staff(including postdoctoral)	(pass)	(pass)	non-Hubei provinces	yes	the humanities and social sciences	(pass)	applied research	strongly disagree	strongly disagree	strongly disagree	strongly disagree	strongly disagree	strongly disagree	strongly disagree	strongly disagree	strongly disagree	strongly disagree	disagree	disagree	strongly disagree	strongly disagree	strongly disagree	disagree	strongly disagree	strongly disagree	strongly disagree	strongly disagree	strongly disagree	strongly disagree	strongly disagree	strongly disagree	still under way but at a slower pace than before	some researchers(including students) cannot attend	few influences to my emotion	yes	no	no	yes	no	yes	no	yes
186	2020/3/4 15:02:27	136s	male	18-24	985、211 universities	none	PhD candidate(non-graduate year)	(pass)	(pass)	non-Hubei provinces	no	Life-science	basic medicine	(pass)	strongly disagree	disagree	neutral	neutral	strongly disagree	neutral	neutral	neutral	neutral	strongly disagree	neutral	neutral	agree	agree	neutral	agree	neutral	neutral	neutral	neutral	neutral	neutral	neutral	neutral	still under way but at a slower pace than before	laboratory facilities are closed or equipments are unavailable┋some researchers(including students) cannot attend┋academic communications between co-workers have been blocked┋difficult to obtain (experimental materials/samples) on time	feeling stress and worry	no	yes	no	yes	no	no	no	yes
187	2020/3/4 15:04:21	304s	female	25-39	985、211 universities	none	PhD candidate(non-graduate year)	(pass)	(pass)	non-Hubei provinces	no	Life-science	clinical medicine	(pass)	strongly disagree	strongly disagree	disagree	disagree	strongly disagree	strongly disagree	strongly disagree	strongly disagree	strongly disagree	disagree	disagree	strongly disagree	disagree	disagree	disagree	disagree	disagree	strongly disagree	disagree	strongly disagree	strongly disagree	strongly disagree	neutral	strongly disagree	Basically at a standstill	laboratory facilities are closed or equipments are unavailable	feeling stress and worry	yes	no	no	no	no	yes	no	yes
188	2020/3/4 15:17:31	208s	female	25-39	985、211 universities	none	PhD candidate(graduate year)	(pass)	(pass)	non-Hubei provinces	yes	Life-science	public health	(pass)	disagree	neutral	neutral	neutral	disagree	neutral	strongly disagree	disagree	disagree	neutral	disagree	disagree	neutral	agree	disagree	disagree	disagree	disagree	disagree	disagree	disagree	strongly disagree	agree	strongly disagree	completely unaffected	(pass)	(pass)	no	no	no	no	no	no	no	no
189	2020/3/4 15:23:43	169s	female	25-39	985、211 universities	none	master candidate(non-graduate year)	not yet	yes	non-Hubei provinces	no	Life-science	public health	(pass)	agree	agree	neutral	strongly agree	neutral	neutral	strongly agree	agree	agree	agree	neutral	agree	agree	agree	agree	agree	agree	neutral	agree	disagree	disagree	strongly disagree	neutral	strongly disagree	Basically at a standstill	others	feeling stress and worry	yes	yes	no	no	no	no	no	no
190	2020/3/4 16:38:36	129s	female	18-24	985、211 universities	none	master candidate(graduate year)	inadequate preparation	yes	non-Hubei provinces	no	non-life science（engineering, natural science, etc.）	(pass)	fundamental research/theoretical research	disagree	strongly agree	neutral	strongly agree	disagree	strongly agree	disagree	strongly disagree	disagree	strongly agree	disagree	neutral	disagree	disagree	strongly disagree	disagree	neutral	neutral	strongly agree	strongly disagree	neutral	strongly disagree	disagree	strongly disagree	Basically at a standstill	laboratory facilities are closed or equipments are unavailable	feeling stress and worry	yes	yes	yes	yes	no	yes	yes	yes
191	2020/3/4 16:54:52	279s	female	40-59	985、211 universities	professor( researcher, chief physician)	basic research staff(including postdoctoral)	(pass)	(pass)	non-Hubei provinces	yes	Life-science	basic medicine	(pass)	strongly disagree	strongly disagree	disagree	disagree	strongly disagree	strongly disagree	strongly disagree	strongly disagree	strongly disagree	strongly disagree	disagree	disagree	disagree	strongly agree	strongly agree	neutral	neutral	strongly disagree	strongly disagree	strongly disagree	strongly disagree	strongly disagree	strongly disagree	strongly disagree	still under way but at a slower pace than before	some researchers(including students) cannot attend	few influences to my emotion	no	no	no	yes	no	yes	no	yes
192	2020/3/4 17:02:37	178s	male	18-24	985、211 universities	none	master candidate(non-graduate year)	not yet	yes	non-Hubei provinces	no	non-life science（engineering, natural science, etc.）	(pass)	applied research	strongly disagree	neutral	neutral	agree	strongly disagree	neutral	strongly disagree	disagree	disagree	strongly disagree	neutral	strongly disagree	agree	agree	strongly disagree	strongly disagree	strongly disagree	strongly disagree	strongly disagree	strongly agree	strongly disagree	strongly disagree	strongly disagree	strongly disagree	Basically at a standstill	laboratory facilities are closed or equipments are unavailable┋academic communications between co-workers have been blocked	feeling stress and worry	yes	yes	no	no	no	yes	yes	yes
193	2020/3/4 17:58:17	153s	female	18-24	general college	none	undergraduates	(pass)	(pass)	non-Hubei provinces	no	Life-science	public health	(pass)	strongly disagree	strongly disagree	strongly disagree	strongly disagree	strongly disagree	strongly disagree	strongly disagree	strongly disagree	strongly disagree	strongly disagree	strongly disagree	strongly disagree	strongly disagree	strongly disagree	strongly disagree	disagree	disagree	strongly disagree	strongly disagree	strongly disagree	strongly disagree	strongly disagree	strongly disagree	strongly disagree	Basically at a standstill	difficult to obtain (experimental materials/samples) on time	few influences to my emotion	no	no	no	no	no	no	no	yes
194	2020/3/4 18:55:02	335s	female	25-39	university affiliated hospital	none	clinical medical staff(including postdoctoral)	(pass)	(pass)	non-Hubei provinces	no	Life-science	others〖护理〗	(pass)	disagree	neutral	neutral	agree	neutral	agree	neutral	disagree	disagree	disagree	disagree	disagree	disagree	strongly agree	strongly agree	agree	disagree	strongly disagree	disagree	strongly disagree	disagree	disagree	disagree	strongly disagree	Basically at a standstill	others	feeling stress and worry	yes	no	no	no	no	no	no	yes
195	2020/3/4 19:28:08	115s	female	40-59	university affiliated hospital	associate professor(associate researcher, associate chief physician)	clinical medical staff(including postdoctoral)	(pass)	(pass)	non-Hubei provinces	yes	Life-science	basic medicine	(pass)	agree	strongly agree	agree	strongly agree	strongly agree	agree	strongly agree	strongly agree	strongly agree	strongly agree	strongly agree	strongly agree	strongly agree	strongly agree	strongly agree	strongly agree	strongly agree	strongly agree	strongly agree	neutral	strongly agree	agree	strongly agree	disagree	Basically at a standstill	laboratory facilities are closed or equipments are unavailable┋some researchers(including students) cannot attend┋academic communications between co-workers have been blocked┋difficult to obtain (experimental materials/samples) on time	feeling about to collapse	yes	yes	yes	yes	yes	yes	yes	yes
196	2020/3/4 19:31:32	118s	male	40-59	independent research institutes (including research institutes)	professor( researcher, chief physician)	basic research staff(including postdoctoral)	(pass)	(pass)	non-Hubei provinces	yes	Life-science	basic medicine	(pass)	agree	strongly agree	strongly agree	strongly agree	agree	strongly agree	neutral	strongly agree	strongly agree	strongly agree	strongly agree	strongly agree	strongly agree	strongly agree	strongly agree	strongly agree	strongly agree	agree	strongly agree	agree	agree	agree	strongly agree	strongly disagree	Basically at a standstill	laboratory facilities are closed or equipments are unavailable┋some researchers(including students) cannot attend┋academic communications between co-workers have been blocked┋difficult to obtain (experimental materials/samples) on time	feeling about to collapse	yes	yes	yes	yes	yes	yes	yes	yes
197	2020/3/4 19:34:06	124s	female	18-24	985、211 universities	none	undergraduates	(pass)	(pass)	non-Hubei provinces	yes	Life-science	basic medicine	(pass)	agree	agree	strongly agree	strongly agree	agree	agree	neutral	strongly agree	agree	strongly agree	agree	strongly agree	strongly agree	strongly agree	strongly disagree	strongly disagree	strongly agree	agree	strongly agree	strongly agree	disagree	strongly disagree	strongly agree	strongly disagree	Basically at a standstill	laboratory facilities are closed or equipments are unavailable┋some researchers(including students) cannot attend┋difficult to obtain (experimental materials/samples) on time	feeling stress and worry	yes	yes	yes	no	yes	yes	yes	no
198	2020/3/4 19:53:16	193s	female	40-59	985、211 universities	associate professor(associate researcher, associate chief physician)	clinical medical staff(including postdoctoral)	(pass)	(pass)	non-Hubei provinces	yes	Life-science	clinical medicine	(pass)	disagree	disagree	disagree	disagree	disagree	disagree	disagree	disagree	disagree	strongly disagree	strongly disagree	strongly disagree	strongly disagree	disagree	disagree	strongly disagree	strongly disagree	strongly disagree	disagree	strongly disagree	disagree	strongly disagree	strongly disagree	strongly disagree	Basically at a standstill	laboratory facilities are closed or equipments are unavailable┋some researchers(including students) cannot attend┋academic communications between co-workers have been blocked┋difficult to obtain (experimental materials/samples) on time	feeling stress and worry	yes	yes	yes	yes	yes	yes	yes	yes
199	2020/3/4 20:22:56	251s	male	18-24	985、211 universities	none	master candidate(non-graduate year)	not yet	no	non-Hubei provinces	yes	Life-science	basic medicine	(pass)	strongly disagree	disagree	neutral	disagree	strongly disagree	strongly disagree	strongly disagree	strongly disagree	disagree	strongly disagree	disagree	disagree	strongly disagree	agree	strongly disagree	agree	disagree	strongly disagree	strongly disagree	strongly disagree	strongly disagree	strongly disagree	strongly disagree	strongly disagree	still under way but at a slower pace than before	laboratory facilities are closed or equipments are unavailable┋some researchers(including students) cannot attend	feeling stress and worry	yes	no	no	no	yes	yes	no	yes
200	2020/3/4 20:23:22	176s	female	18-24	985、211 universities	none	undergraduates	(pass)	(pass)	non-Hubei provinces	no	Life-science	basic medicine	(pass)	disagree	neutral	neutral	disagree	neutral	neutral	neutral	disagree	neutral	strongly disagree	neutral	strongly disagree	disagree	strongly disagree	disagree	strongly disagree	neutral	strongly disagree	disagree	strongly disagree	strongly disagree	agree	neutral	strongly disagree	Basically at a standstill	some researchers(including students) cannot attend	few influences to my emotion	yes	yes	no	yes	no	yes	no	yes
201	2020/3/4 20:26:24	326s	female	25-39	985、211 universities	professor( researcher, chief physician)	basic research staff(including postdoctoral)	(pass)	(pass)	non-Hubei provinces	yes	Life-science	basic medicine	(pass)	strongly disagree	strongly disagree	disagree	disagree	strongly disagree	strongly disagree	strongly disagree	strongly disagree	strongly disagree	strongly disagree	disagree	strongly disagree	strongly disagree	strongly disagree	strongly disagree	disagree	strongly disagree	strongly disagree	strongly disagree	strongly disagree	strongly disagree	agree	disagree	strongly disagree	still under way but at a slower pace than before	some researchers(including students) cannot attend	few influences to my emotion	yes	yes	yes	yes	yes	no	yes	yes
202	2020/3/4 20:29:38	227s	female	25-39	985、211 universities	none	PhD candidate(non-graduate year)	(pass)	(pass)	non-Hubei provinces	yes	Life-science	basic medicine	(pass)	strongly disagree	strongly disagree	strongly disagree	strongly disagree	strongly disagree	strongly disagree	strongly disagree	strongly disagree	strongly disagree	strongly disagree	strongly disagree	strongly disagree	strongly disagree	strongly disagree	strongly disagree	disagree	strongly disagree	strongly disagree	strongly disagree	strongly disagree	strongly disagree	strongly disagree	strongly disagree	strongly disagree	still under way but at a slower pace than before	laboratory facilities are closed or equipments are unavailable┋academic communications between co-workers have been blocked┋difficult to obtain (experimental materials/samples) on time	few influences to my emotion	yes	yes	no	yes	yes	yes	yes	no
203	2020/3/4 22:48:18	162s	female	25-39	university affiliated hospital	lecturer(assistant researcher, attending physician)	clinical medical staff(including postdoctoral)	(pass)	(pass)	non-Hubei provinces	yes	Life-science	clinical medicine	(pass)	strongly disagree	strongly disagree	disagree	neutral	strongly disagree	strongly disagree	strongly disagree	strongly disagree	disagree	disagree	disagree	strongly disagree	neutral	agree	disagree	disagree	disagree	strongly disagree	disagree	strongly disagree	disagree	strongly disagree	agree	strongly disagree	Basically at a standstill	laboratory facilities are closed or equipments are unavailable┋some researchers(including students) cannot attend┋difficult to obtain (experimental materials/samples) on time	feeling stress and worry	yes	no	no	yes	no	yes	yes	yes
204	2020/3/4 23:34:07	169s	male	18-24	985、211 universities	none	undergraduates	(pass)	(pass)	non-Hubei provinces	yes	Life-science	basic medicine	(pass)	strongly disagree	strongly disagree	strongly disagree	neutral	strongly disagree	strongly disagree	strongly disagree	strongly disagree	strongly disagree	strongly disagree	strongly disagree	disagree	disagree	agree	strongly disagree	strongly disagree	strongly disagree	strongly disagree	strongly disagree	strongly disagree	strongly disagree	strongly disagree	disagree	strongly disagree	completely unaffected	(pass)	(pass)	no	no	no	no	no	no	no	no
205	2020/3/4 23:38:51	148s	male	18-24	985、211 universities	none	undergraduates	(pass)	(pass)	non-Hubei provinces	yes	Life-science	clinical medicine	(pass)	strongly disagree	strongly disagree	neutral	neutral	disagree	strongly disagree	strongly disagree	strongly disagree	agree	strongly disagree	disagree	strongly disagree	strongly disagree	strongly disagree	strongly disagree	strongly disagree	strongly disagree	disagree	disagree	strongly disagree	strongly disagree	strongly disagree	strongly disagree	strongly disagree	Basically at a standstill	laboratory facilities are closed or equipments are unavailable┋some researchers(including students) cannot attend┋academic communications between co-workers have been blocked┋difficult to obtain (experimental materials/samples) on time	feeling stress and worry	yes	no	yes	yes	no	no	no	no
206	2020/3/4 23:40:39	229s	male	18-24	985、211 universities	none	undergraduates	(pass)	(pass)	non-Hubei provinces	yes	Life-science	clinical medicine	(pass)	neutral	neutral	neutral	agree	neutral	agree	disagree	agree	neutral	neutral	neutral	agree	neutral	neutral	neutral	neutral	neutral	neutral	agree	agree	neutral	agree	neutral	strongly disagree	still under way but at a slower pace than before	laboratory facilities are closed or equipments are unavailable┋academic communications between co-workers have been blocked┋difficult to obtain (experimental materials/samples) on time	feeling stress and worry	yes	yes	yes	no	yes	yes	no	yes
207	2020/3/4 23:49:43	146s	male	18-24	university affiliated hospital	none	master candidate(non-graduate year)	complete preparation	yes	non-Hubei provinces	no	Life-science	clinical medicine	(pass)	strongly disagree	strongly disagree	strongly disagree	strongly disagree	strongly disagree	strongly disagree	strongly disagree	strongly disagree	strongly disagree	strongly disagree	strongly disagree	strongly disagree	strongly disagree	strongly disagree	strongly disagree	strongly disagree	strongly disagree	strongly disagree	strongly disagree	strongly disagree	strongly disagree	strongly disagree	strongly disagree	strongly disagree	still under way but at a slower pace than before	laboratory facilities are closed or equipments are unavailable┋academic communications between co-workers have been blocked┋difficult to obtain (experimental materials/samples) on time	few influences to my emotion	yes	no	no	yes	no	yes	yes	yes
208	2020/3/4 23:49:51	133s	male	18-24	985、211 universities	none	undergraduates	(pass)	(pass)	non-Hubei provinces	no	Life-science	others〖药学〗	(pass)	strongly disagree	neutral	strongly disagree	disagree	strongly disagree	agree	strongly disagree	strongly disagree	strongly disagree	neutral	strongly disagree	strongly disagree	neutral	agree	agree	strongly disagree	strongly disagree	disagree	disagree	strongly disagree	strongly disagree	strongly agree	strongly disagree	strongly disagree	Basically at a standstill	laboratory facilities are closed or equipments are unavailable┋some researchers(including students) cannot attend	feeling stress and worry	yes	yes	no	yes	no	yes	yes	yes
209	2020/3/4 23:50:07	374s	male	40-59	university affiliated hospital	professor( researcher, chief physician)	clinical medical staff(including postdoctoral)	(pass)	(pass)	non-Hubei provinces	yes	Life-science	clinical medicine	(pass)	neutral	agree	neutral	neutral	disagree	neutral	neutral	neutral	disagree	disagree	disagree	strongly disagree	disagree	disagree	agree	agree	agree	neutral	agree	disagree	disagree	agree	agree	disagree	Basically at a standstill	laboratory facilities are closed or equipments are unavailable┋some researchers(including students) cannot attend┋academic communications between co-workers have been blocked┋difficult to obtain (experimental materials/samples) on time	feeling stress and worry	yes	no	no	no	no	no	no	yes
210	2020/3/5 0:02:14	92s	male	18-24	985、211 universities	none	undergraduates	(pass)	(pass)	non-Hubei provinces	yes	Life-science	public health	(pass)	strongly disagree	disagree	strongly disagree	neutral	strongly disagree	disagree	strongly disagree	strongly disagree	strongly disagree	disagree	strongly disagree	strongly disagree	strongly disagree	disagree	strongly disagree	strongly disagree	strongly disagree	strongly disagree	strongly disagree	strongly disagree	strongly disagree	strongly disagree	strongly disagree	strongly disagree	completely unaffected	(pass)	(pass)	no	no	no	no	no	no	no	yes
211	2020/3/5 0:03:22	160s	male	18-24	985、211 universities	none	undergraduates	(pass)	(pass)	non-Hubei provinces	yes	Life-science	basic medicine	(pass)	strongly disagree	strongly disagree	strongly disagree	strongly disagree	strongly disagree	strongly disagree	strongly disagree	strongly disagree	strongly disagree	strongly disagree	strongly disagree	strongly disagree	strongly disagree	disagree	disagree	strongly disagree	neutral	strongly disagree	disagree	strongly disagree	strongly disagree	strongly disagree	strongly disagree	strongly disagree	still under way but at a slower pace than before	laboratory facilities are closed or equipments are unavailable┋academic communications between co-workers have been blocked	feeling stress and worry	yes	no	no	no	no	yes	no	no
212	2020/3/5 8:16:28	125s	male	18-24	general college	none	undergraduates	(pass)	(pass)	non-Hubei provinces	yes	Life-science	basic medicine	(pass)	strongly disagree	strongly disagree	strongly disagree	strongly disagree	strongly disagree	strongly disagree	strongly disagree	strongly disagree	strongly disagree	strongly disagree	strongly disagree	strongly disagree	strongly disagree	strongly disagree	strongly disagree	strongly disagree	strongly disagree	strongly disagree	strongly disagree	strongly disagree	strongly disagree	strongly disagree	disagree	strongly disagree	still under way but at a slower pace than before	laboratory facilities are closed or equipments are unavailable┋some researchers(including students) cannot attend┋academic communications between co-workers have been blocked┋difficult to obtain (experimental materials/samples) on time	few influences to my emotion	no	no	no	no	no	no	no	no
213	2020/3/5 8:17:49	186s	male	18-24	985、211 universities	none	PhD candidate(graduate year)	(pass)	(pass)	non-Hubei provinces	yes	Life-science	clinical medicine	(pass)	strongly disagree	strongly disagree	strongly disagree	strongly disagree	strongly disagree	strongly disagree	strongly disagree	strongly disagree	strongly disagree	strongly disagree	strongly disagree	strongly disagree	strongly disagree	strongly disagree	strongly disagree	neutral	strongly disagree	strongly disagree	strongly disagree	strongly disagree	strongly disagree	strongly disagree	strongly disagree	strongly disagree	Basically at a standstill	laboratory facilities are closed or equipments are unavailable	few influences to my emotion	yes	yes	no	no	no	yes	no	yes
214	2020/3/5 9:27:27	140s	male	18-24	985、211 universities	none	undergraduates	(pass)	(pass)	non-Hubei provinces	yes	Life-science	basic medicine	(pass)	strongly disagree	strongly disagree	disagree	disagree	strongly disagree	strongly disagree	strongly disagree	strongly disagree	strongly disagree	disagree	strongly disagree	disagree	strongly disagree	agree	neutral	agree	disagree	strongly disagree	strongly disagree	strongly disagree	strongly disagree	strongly disagree	strongly disagree	strongly disagree	still under way but at a slower pace than before	laboratory facilities are closed or equipments are unavailable┋academic communications between co-workers have been blocked┋difficult to obtain (experimental materials/samples) on time	feeling stress and worry	yes	yes	yes	no	no	yes	no	yes
215	2020/3/5 15:57:53	210s	female	18-24	985、211 universities	none	undergraduates	(pass)	(pass)	non-Hubei provinces	no	non-life science（engineering, natural science, etc.）	(pass)	applied research	strongly disagree	strongly disagree	strongly disagree	strongly agree	strongly disagree	strongly disagree	strongly disagree	strongly disagree	agree	neutral	disagree	neutral	disagree	disagree	disagree	disagree	disagree	disagree	disagree	neutral	disagree	disagree	agree	strongly disagree	still under way but at a slower pace than before	some researchers(including students) cannot attend	feeling about to collapse	yes	yes	no	yes	no	yes	yes	yes
216	2020/3/5 15:58:09	129s	male	25-39	985、211 universities	associate professor(associate researcher, associate chief physician)	basic research staff(including postdoctoral)	(pass)	(pass)	non-Hubei provinces	yes	Life-science	basic medicine	(pass)	agree	strongly agree	strongly agree	strongly agree	agree	strongly agree	agree	strongly agree	strongly agree	strongly agree	strongly agree	strongly agree	strongly agree	strongly agree	neutral	strongly agree	strongly agree	agree	strongly agree	neutral	agree	disagree	strongly agree	strongly disagree	Basically at a standstill	laboratory facilities are closed or equipments are unavailable┋some researchers(including students) cannot attend┋academic communications between co-workers have been blocked┋difficult to obtain (experimental materials/samples) on time	feeling stress and worry	yes	no	no	no	yes	yes	yes	yes
217	2020/3/5 16:15:20	184s	female	25-39	985、211 universities	lecturer(assistant researcher, attending physician)	basic research staff(including postdoctoral)	(pass)	(pass)	non-Hubei provinces	yes	Life-science	basic medicine	(pass)	neutral	disagree	neutral	agree	disagree	neutral	agree	agree	neutral	neutral	disagree	agree	neutral	disagree	disagree	disagree	neutral	disagree	agree	disagree	neutral	strongly disagree	agree	strongly disagree	still under way but at a slower pace than before	laboratory facilities are closed or equipments are unavailable┋difficult to obtain (experimental materials/samples) on time	feeling stress and worry	yes	yes	no	no	no	yes	yes	yes
218	2020/3/5 21:24:00	56s	male	18-24	985、211 universities	none	undergraduates	(pass)	(pass)	non-Hubei provinces	yes	Life-science	public health	(pass)	strongly disagree	strongly disagree	strongly disagree	strongly disagree	strongly disagree	strongly disagree	strongly disagree	strongly disagree	strongly disagree	strongly disagree	strongly disagree	strongly disagree	strongly disagree	strongly disagree	strongly disagree	strongly disagree	strongly disagree	strongly disagree	strongly disagree	strongly disagree	strongly disagree	strongly disagree	strongly disagree	strongly disagree	completely unaffected	(pass)	(pass)	no	no	no	no	no	no	no	no
219	2020/3/5 21:34:57	153s	female	25-39	985、211 universities	none	master candidate(non-graduate year)	not yet	no	non-Hubei provinces	no	Life-science	others〖检验〗	(pass)	strongly disagree	disagree	disagree	disagree	strongly disagree	strongly disagree	strongly disagree	strongly disagree	strongly disagree	strongly disagree	strongly disagree	strongly disagree	strongly disagree	strongly disagree	strongly disagree	strongly disagree	strongly disagree	strongly disagree	strongly disagree	strongly disagree	strongly disagree	strongly disagree	disagree	strongly disagree	Basically at a standstill	laboratory facilities are closed or equipments are unavailable	feeling stress and worry	yes	yes	yes	yes	yes	yes	yes	yes
220	2020/3/5 21:50:28	150s	female	18-24	985、211 universities	none	undergraduates	(pass)	(pass)	non-Hubei provinces	no	others〖clinical medicine医学〗	(pass)	fundamental research/theoretical research	strongly agree	agree	agree	agree	agree	agree	agree	agree	agree	agree	agree	disagree	strongly disagree	strongly disagree	agree	strongly disagree	strongly disagree	neutral	agree	neutral	strongly disagree	strongly disagree	strongly agree	strongly disagree	Basically at a standstill	laboratory facilities are closed or equipments are unavailable┋some researchers(including students) cannot attend┋academic communications between co-workers have been blocked┋difficult to obtain (experimental materials/samples) on time	feeling stress and worry	yes	yes	yes	yes	no	yes	no	yes
221	2020/3/5 21:52:23	118s	male	18-24	985、211 universities	none	undergraduates	(pass)	(pass)	non-Hubei provinces	yes	Life-science	basic medicine	(pass)	strongly disagree	strongly disagree	strongly disagree	strongly disagree	strongly disagree	strongly disagree	strongly disagree	strongly disagree	strongly disagree	strongly disagree	strongly disagree	strongly disagree	strongly disagree	strongly disagree	strongly disagree	strongly disagree	strongly disagree	strongly disagree	strongly disagree	strongly disagree	strongly disagree	strongly disagree	strongly disagree	strongly disagree	completely unaffected	(pass)	(pass)	yes	yes	yes	yes	yes	yes	yes	yes
222	2020/3/5 21:53:13	127s	female	18-24	985、211 universities	none	master candidate(non-graduate year)	inadequate preparation	yes	non-Hubei provinces	yes	Life-science	basic medicine	(pass)	agree	strongly agree	strongly agree	strongly agree	strongly agree	strongly agree	strongly agree	strongly agree	strongly agree	strongly agree	strongly agree	strongly agree	strongly agree	strongly agree	strongly agree	strongly agree	agree	neutral	neutral	neutral	agree	neutral	strongly agree	strongly agree	Basically at a standstill	laboratory facilities are closed or equipments are unavailable	few influences to my emotion	no	no	no	no	no	no	no	no
223	2020/3/5 21:57:54	290s	female	25-39	985、211 universities	none	undergraduates	(pass)	(pass)	non-Hubei provinces	no	Life-science	clinical medicine	(pass)	disagree	agree	agree	agree	disagree	agree	neutral	agree	agree	neutral	agree	agree	agree	agree	agree	agree	neutral	disagree	agree	neutral	agree	disagree	agree	strongly disagree	completely unaffected	(pass)	(pass)	yes	yes	no	no	no	no	no	no
224	2020/3/5 22:04:07	147s	female	18-24	985、211 universities	none	undergraduates	(pass)	(pass)	non-Hubei provinces	yes	Life-science	basic medicine	(pass)	disagree	disagree	disagree	disagree	neutral	neutral	strongly disagree	disagree	neutral	neutral	disagree	disagree	neutral	disagree	disagree	neutral	disagree	disagree	disagree	disagree	disagree	strongly disagree	strongly disagree	strongly disagree	still under way but at a slower pace than before	laboratory facilities are closed or equipments are unavailable┋some researchers(including students) cannot attend	feeling stress and worry	no	no	no	no	no	no	no	no
225	2020/3/5 22:06:01	161s	female	25-39	985、211 universities	none	master candidate(graduate year)	inadequate preparation	no	non-Hubei provinces	yes	Life-science	basic medicine	(pass)	neutral	neutral	agree	strongly agree	agree	neutral	agree	agree	neutral	neutral	agree	neutral	agree	strongly agree	strongly agree	strongly agree	strongly agree	neutral	neutral	neutral	agree	disagree	neutral	strongly disagree	still under way but at a slower pace than before	difficult to obtain (experimental materials/samples) on time	feeling stress and worry	yes	yes	yes	yes	yes	yes	yes	yes
226	2020/3/5 22:06:40	255s	female	18-24	985、211 universities	none	master candidate(non-graduate year)	not yet	yes	non-Hubei provinces	yes	Life-science	basic medicine	(pass)	strongly disagree	strongly disagree	neutral	strongly agree	strongly disagree	neutral	strongly disagree	disagree	neutral	strongly disagree	disagree	strongly disagree	disagree	agree	strongly agree	strongly agree	neutral	strongly disagree	neutral	disagree	disagree	strongly disagree	agree	strongly disagree	completely unaffected	(pass)	(pass)	no	no	no	no	no	no	no	no
227	2020/3/5 22:10:41	220s	female	25-39	985、211 universities	lecturer(assistant researcher, attending physician)	PhD candidate(graduate year)	(pass)	(pass)	non-Hubei provinces	yes	Life-science	basic medicine	(pass)	strongly disagree	strongly disagree	strongly disagree	strongly disagree	strongly disagree	strongly disagree	strongly disagree	strongly disagree	strongly disagree	strongly disagree	strongly disagree	strongly disagree	strongly disagree	strongly disagree	strongly disagree	strongly disagree	strongly disagree	strongly disagree	strongly disagree	strongly disagree	strongly disagree	neutral	strongly disagree	strongly disagree	Basically at a standstill	laboratory facilities are closed or equipments are unavailable┋some researchers(including students) cannot attend	few influences to my emotion	yes	no	no	no	no	no	no	yes
228	2020/3/5 22:17:25	223s	male	18-24	985、211 universities	none	PhD candidate(non-graduate year)	(pass)	(pass)	non-Hubei provinces	no	Life-science	basic medicine	(pass)	strongly disagree	strongly disagree	strongly disagree	disagree	strongly disagree	strongly disagree	strongly disagree	strongly disagree	strongly disagree	strongly disagree	strongly disagree	strongly disagree	strongly disagree	strongly disagree	strongly disagree	disagree	strongly disagree	disagree	strongly disagree	disagree	strongly disagree	strongly disagree	strongly disagree	strongly disagree	completely unaffected	(pass)	(pass)	no	yes	no	no	no	no	no	no
229	2020/3/5 22:20:10	155s	male	18-24	985、211 universities	none	undergraduates	(pass)	(pass)	non-Hubei provinces	yes	Life-science	basic medicine	(pass)	strongly disagree	disagree	disagree	disagree	strongly disagree	disagree	disagree	strongly disagree	disagree	disagree	strongly disagree	strongly disagree	strongly disagree	strongly disagree	disagree	strongly disagree	disagree	disagree	strongly disagree	disagree	strongly disagree	disagree	neutral	neutral	still under way but at a slower pace than before	laboratory facilities are closed or equipments are unavailable┋some researchers(including students) cannot attend┋academic communications between co-workers have been blocked┋difficult to obtain (experimental materials/samples) on time	feeling stress and worry	no	yes	yes	no	no	yes	no	yes
230	2020/3/5 22:22:50	240s	male	25-39	985、211 universities	none	PhD candidate(graduate year)	(pass)	(pass)	non-Hubei provinces	yes	Life-science	basic medicine	(pass)	disagree	disagree	disagree	disagree	disagree	disagree	disagree	disagree	disagree	disagree	disagree	disagree	disagree	strongly disagree	disagree	strongly disagree	strongly disagree	disagree	disagree	disagree	disagree	disagree	disagree	strongly disagree	Basically at a standstill	some researchers(including students) cannot attend	feeling stress and worry	yes	yes	no	no	no	no	no	no
231	2020/3/5 22:24:48	326s	male	18-24	985、211 universities	none	master candidate(graduate year)	well preparation	yes	non-Hubei provinces	yes	Life-science	basic medicine	(pass)	strongly disagree	strongly disagree	strongly disagree	strongly disagree	strongly disagree	strongly disagree	strongly disagree	strongly disagree	strongly disagree	strongly disagree	strongly disagree	strongly disagree	strongly disagree	strongly disagree	strongly disagree	disagree	strongly disagree	strongly disagree	strongly disagree	strongly disagree	strongly disagree	strongly disagree	strongly disagree	strongly disagree	still under way but at a slower pace than before	laboratory facilities are closed or equipments are unavailable┋some researchers(including students) cannot attend	feeling stress and worry	yes	yes	yes	no	no	yes	no	yes
232	2020/3/5 22:25:25	538s	female	18-24	985、211 universities	none	master candidate(non-graduate year)	not yet	no	non-Hubei provinces	no	Life-science	clinical medicine	(pass)	strongly disagree	strongly disagree	disagree	disagree	strongly disagree	strongly disagree	strongly disagree	strongly disagree	disagree	strongly disagree	disagree	strongly disagree	strongly disagree	strongly disagree	strongly disagree	disagree	strongly disagree	strongly disagree	agree	strongly disagree	strongly disagree	strongly disagree	strongly disagree	strongly disagree	Basically at a standstill	laboratory facilities are closed or equipments are unavailable┋some researchers(including students) cannot attend	few influences to my emotion	no	no	no	yes	no	yes	yes	yes
233	2020/3/5 22:29:35	298s	male	40-59	985、211 universities	associate professor(associate researcher, associate chief physician)	basic research staff(including postdoctoral)	(pass)	(pass)	non-Hubei provinces	yes	Life-science	basic medicine	(pass)	strongly disagree	strongly disagree	strongly disagree	strongly disagree	strongly disagree	strongly disagree	strongly disagree	strongly disagree	strongly disagree	strongly disagree	strongly disagree	strongly disagree	strongly disagree	strongly disagree	strongly disagree	strongly disagree	strongly disagree	strongly disagree	strongly disagree	strongly disagree	strongly disagree	strongly disagree	strongly disagree	strongly disagree	still under way but at a slower pace than before	laboratory facilities are closed or equipments are unavailable┋some researchers(including students) cannot attend	few influences to my emotion	yes	no	no	no	no	no	no	yes
234	2020/3/5 22:35:34	67s	female	18-24	985、211 universities	none	master candidate(graduate year)	inadequate preparation	no	non-Hubei provinces	yes	Life-science	basic medicine	(pass)	strongly agree	strongly agree	strongly agree	strongly agree	strongly agree	strongly agree	strongly agree	strongly agree	strongly agree	strongly agree	strongly agree	strongly agree	strongly agree	strongly agree	strongly agree	strongly agree	strongly agree	strongly agree	strongly agree	strongly agree	strongly agree	strongly agree	strongly agree	strongly agree	Basically at a standstill	laboratory facilities are closed or equipments are unavailable	feeling about to collapse	yes	yes	yes	yes	yes	yes	yes	yes
235	2020/3/5 22:37:04	334s	female	18-24	985、211 universities	none	master candidate(non-graduate year)	well preparation	yes	non-Hubei provinces	yes	Life-science	basic medicine	(pass)	strongly disagree	disagree	disagree	disagree	strongly disagree	strongly disagree	disagree	disagree	disagree	strongly disagree	neutral	strongly disagree	disagree	disagree	disagree	strongly disagree	strongly disagree	neutral	neutral	disagree	strongly disagree	strongly disagree	agree	strongly disagree	still under way but at a slower pace than before	others〖在家办公效率低下，容易受到家里的事情干扰。〗	feeling stress and worry	yes	no	no	no	no	no	no	yes
236	2020/3/5 22:38:05	294s	male	18-24	985、211 universities	none	master candidate(non-graduate year)	inadequate preparation	yes	non-Hubei provinces	yes	Life-science	others〖分子生物学〗	(pass)	strongly disagree	disagree	disagree	disagree	strongly disagree	strongly disagree	strongly disagree	strongly disagree	strongly disagree	strongly disagree	strongly disagree	strongly disagree	strongly disagree	strongly disagree	strongly disagree	strongly disagree	strongly disagree	strongly disagree	strongly disagree	strongly disagree	strongly disagree	strongly disagree	strongly disagree	strongly disagree	still under way but at a slower pace than before	laboratory facilities are closed or equipments are unavailable┋difficult to obtain (experimental materials/samples) on time	feeling stress and worry	yes	yes	yes	yes	no	no	no	no
237	2020/3/6 1:26:06	122s	male	25-39	985、211 universities	none	PhD candidate(graduate year)	(pass)	(pass)	non-Hubei provinces	yes	Life-science	clinical medicine	(pass)	disagree	neutral	neutral	neutral	neutral	neutral	neutral	neutral	neutral	neutral	neutral	neutral	neutral	neutral	neutral	neutral	neutral	neutral	neutral	neutral	neutral	neutral	neutral	neutral	still under way but at a slower pace than before	laboratory facilities are closed or equipments are unavailable	feeling stress and worry	yes	yes	yes	yes	yes	yes	yes	yes
238	2020/3/6 1:37:51	201s	female	18-24	985、211 universities	none	master candidate(graduate year)	inadequate preparation	no	non-Hubei provinces	no	Life-science	basic medicine	(pass)	strongly disagree	strongly disagree	strongly disagree	strongly disagree	strongly disagree	strongly disagree	strongly disagree	strongly disagree	strongly disagree	strongly disagree	strongly disagree	strongly disagree	strongly disagree	strongly disagree	strongly disagree	strongly disagree	strongly disagree	strongly disagree	strongly disagree	strongly disagree	strongly disagree	strongly disagree	strongly disagree	strongly disagree	still under way but at a slower pace than before	laboratory facilities are closed or equipments are unavailable┋academic communications between co-workers have been blocked┋difficult to obtain (experimental materials/samples) on time	feeling stress and worry	yes	yes	yes	yes	no	yes	no	yes
239	2020/3/6 9:42:32	279s	female	25-39	985、211 universities	none	PhD candidate(non-graduate year)	(pass)	(pass)	non-Hubei provinces	yes	Life-science	basic medicine	(pass)	neutral	agree	neutral	disagree	neutral	neutral	disagree	neutral	disagree	disagree	disagree	disagree	disagree	strongly disagree	agree	disagree	disagree	strongly disagree	disagree	strongly disagree	strongly disagree	disagree	strongly disagree	strongly disagree	Basically at a standstill	laboratory facilities are closed or equipments are unavailable┋some researchers(including students) cannot attend	few influences to my emotion	yes	no	no	no	no	yes	no	no
240	2020/3/6 10:13:30	162s	female	18-24	985、211 universities	none	master candidate(non-graduate year)	inadequate preparation	no	non-Hubei provinces	yes	Life-science	basic medicine	(pass)	neutral	agree	neutral	strongly agree	agree	strongly agree	neutral	agree	agree	agree	agree	neutral	agree	strongly agree	strongly agree	disagree	neutral	disagree	agree	strongly disagree	agree	strongly disagree	strongly agree	strongly disagree	Basically at a standstill	laboratory facilities are closed or equipments are unavailable┋some researchers(including students) cannot attend	feeling stress and worry	yes	yes	yes	yes	yes	yes	yes	yes
241	2020/3/6 11:17:06	208s	male	25-39	985、211 universities	none	PhD candidate(graduate year)	(pass)	(pass)	non-Hubei provinces	yes	Life-science	basic medicine	(pass)	disagree	strongly agree	neutral	agree	agree	strongly disagree	strongly disagree	disagree	neutral	strongly disagree	disagree	agree	neutral	agree	strongly agree	strongly disagree	strongly disagree	strongly disagree	disagree	disagree	neutral	neutral	neutral	agree	still under way but at a slower pace than before	difficult to obtain (experimental materials/samples) on time	feeling stress and worry	yes	yes	no	yes	no	yes	no	yes
242	2020/3/6 11:27:56	277s	male	25-39	985、211 universities	none	PhD candidate(non-graduate year)	(pass)	(pass)	non-Hubei provinces	no	others〖公共卫生与预防医学〗	(pass)	fundamental research/theoretical research	strongly disagree	strongly disagree	strongly disagree	strongly disagree	strongly disagree	strongly disagree	strongly disagree	strongly disagree	strongly disagree	strongly disagree	strongly disagree	strongly disagree	strongly disagree	strongly disagree	strongly disagree	strongly disagree	strongly disagree	strongly disagree	strongly disagree	strongly disagree	strongly disagree	strongly disagree	strongly disagree	strongly disagree	still under way but at a slower pace than before	some researchers(including students) cannot attend┋academic communications between co-workers have been blocked	feeling stress and worry	yes	no	no	no	no	yes	no	yes
243	2020/3/6 11:29:46	202s	female	18-24	985、211 universities	none	undergraduates	(pass)	(pass)	non-Hubei provinces	yes	Life-science	clinical medicine	(pass)	disagree	disagree	disagree	neutral	strongly disagree	disagree	disagree	disagree	disagree	disagree	disagree	neutral	disagree	neutral	disagree	strongly disagree	disagree	disagree	disagree	disagree	disagree	disagree	strongly disagree	strongly disagree	still under way but at a slower pace than before	laboratory facilities are closed or equipments are unavailable┋others〖vpn太慢了〗	feeling stress and worry	yes	no	no	yes	yes	yes	no	no
244	2020/3/6 11:29:54	483s	male	25-39	non-university affiliated hospital	none	clinical medical staff(including postdoctoral)	(pass)	(pass)	non-Hubei provinces	no	others	(pass)	others	neutral	agree	agree	agree	strongly disagree	disagree	strongly disagree	disagree	disagree	strongly disagree	disagree	disagree	agree	disagree	disagree	disagree	disagree	strongly disagree	strongly disagree	disagree	strongly disagree	strongly disagree	strongly disagree	strongly disagree	still under way but at a slower pace than before	academic communications between co-workers have been blocked	few influences to my emotion	yes	yes	yes	yes	yes	yes	yes	yes
245	2020/3/6 11:32:30	165s	male	18-24	985、211 universities	none	undergraduates	(pass)	(pass)	non-Hubei provinces	yes	Life-science	basic medicine	(pass)	strongly disagree	disagree	disagree	disagree	strongly disagree	disagree	strongly disagree	strongly disagree	disagree	disagree	disagree	strongly disagree	strongly disagree	strongly disagree	strongly disagree	strongly disagree	disagree	strongly disagree	disagree	strongly disagree	disagree	strongly disagree	disagree	strongly disagree	still under way but at a slower pace than before	laboratory facilities are closed or equipments are unavailable┋some researchers(including students) cannot attend┋difficult to obtain (experimental materials/samples) on time	few influences to my emotion	yes	yes	no	no	no	yes	no	yes
246	2020/3/6 11:35:46	95s	male	18-24	general college	none	undergraduates	(pass)	(pass)	non-Hubei provinces	no	others〖民航业〗	(pass)	applied research	strongly disagree	strongly disagree	strongly disagree	strongly disagree	strongly disagree	strongly disagree	strongly disagree	strongly disagree	strongly disagree	strongly disagree	strongly disagree	strongly disagree	strongly disagree	strongly disagree	strongly disagree	strongly disagree	strongly disagree	strongly disagree	strongly disagree	strongly disagree	strongly disagree	strongly disagree	strongly disagree	strongly disagree	Basically at a standstill	others	few influences to my emotion	no	no	no	no	no	no	no	no
247	2020/3/6 11:44:55	197s	male	18-24	985、211 universities	none	undergraduates	(pass)	(pass)	non-Hubei provinces	no	non-life science（engineering, natural science, etc.）	(pass)	fundamental research/theoretical research	strongly disagree	agree	agree	strongly disagree	strongly disagree	strongly disagree	strongly disagree	strongly disagree	strongly disagree	disagree	strongly disagree	strongly disagree	strongly disagree	strongly disagree	strongly disagree	strongly disagree	strongly disagree	agree	strongly disagree	strongly disagree	strongly disagree	strongly disagree	agree	strongly disagree	still under way but at a slower pace than before	laboratory facilities are closed or equipments are unavailable┋difficult to obtain (experimental materials/samples) on time	few influences to my emotion	yes	yes	yes	yes	no	yes	no	yes
248	2020/3/6 13:30:10	126s	male	18-24	985、211 universities	none	undergraduates	(pass)	(pass)	non-Hubei provinces	yes	non-life science（engineering, natural science, etc.）	(pass)	fundamental research/theoretical research	agree	strongly disagree	strongly agree	strongly agree	agree	agree	agree	agree	strongly agree	strongly disagree	strongly agree	strongly disagree	strongly agree	strongly agree	strongly disagree	strongly disagree	strongly agree	strongly disagree	strongly disagree	strongly agree	disagree	agree	disagree	strongly disagree	still under way but at a slower pace than before	laboratory facilities are closed or equipments are unavailable┋difficult to obtain (experimental materials/samples) on time	feeling about to collapse	yes	no	yes	no	no	no	no	no
249	2020/3/6 14:17:11	112s	male	18-24	985、211 universities	none	undergraduates	(pass)	(pass)	non-Hubei provinces	yes	non-life science（engineering, natural science, etc.）	(pass)	applied research	strongly disagree	strongly disagree	strongly disagree	strongly disagree	strongly disagree	strongly disagree	strongly disagree	strongly disagree	strongly disagree	strongly disagree	strongly disagree	strongly disagree	strongly disagree	strongly disagree	strongly disagree	strongly disagree	strongly disagree	strongly disagree	strongly disagree	strongly disagree	strongly disagree	strongly disagree	strongly agree	strongly disagree	completely unaffected	(pass)	(pass)	no	no	no	no	no	no	no	no
250	2020/3/7 9:19:51	221s	male	25-39	university affiliated hospital	none	clinical medical staff(including postdoctoral)	(pass)	(pass)	non-Hubei provinces	no	Life-science	clinical medicine	(pass)	strongly disagree	strongly disagree	disagree	disagree	strongly disagree	disagree	disagree	disagree	disagree	disagree	disagree	disagree	disagree	disagree	disagree	disagree	disagree	disagree	disagree	disagree	disagree	disagree	disagree	disagree	still under way but at a slower pace than before	laboratory facilities are closed or equipments are unavailable┋some researchers(including students) cannot attend┋academic communications between co-workers have been blocked┋difficult to obtain (experimental materials/samples) on time	feeling stress and worry	yes	yes	yes	yes	yes	yes	yes	yes
251	2020/3/7 9:20:57	179s	male	25-39	985、211 universities	none	PhD candidate(non-graduate year)	(pass)	(pass)	non-Hubei provinces	no	Life-science	clinical medicine	(pass)	strongly disagree	strongly disagree	strongly disagree	disagree	strongly disagree	disagree	strongly disagree	strongly disagree	strongly disagree	strongly disagree	disagree	strongly disagree	strongly disagree	strongly disagree	strongly disagree	disagree	disagree	strongly disagree	strongly disagree	strongly disagree	disagree	disagree	disagree	strongly disagree	Basically at a standstill	laboratory facilities are closed or equipments are unavailable┋some researchers(including students) cannot attend┋difficult to obtain (experimental materials/samples) on time┋others	feeling stress and worry	yes	yes	yes	yes	yes	yes	yes	yes
[truncated: 7 more columns]
